# Supplementary material for: Epigenome-wide association study in peripheral white blood cells involving insulin resistance
Source: PubMed Central journal article supplement (PMC6385280; doi:10.1038/s41598-019-38980-2), 2019-02-21
Supplement: 41598_2019_38980_MOESM1_ESM.pdf [file 41598_2019_38980_MOESM1_ESM.pdf]

## Epigenome-wide association study in peripheral white blood cells involving insulin resistance

Ana Arpón, Fermín I. Milagro, Omar Ramos-Lopez, M. Luisa Mansego, José Luis Santos, José-Ignacio Riezu-Boj, J. Alfredo Martínez

Page 2 → Table S1: Selection of 798 CpGs after linear regression by  $FDR < 0.05$  and  $slope \geq |0.1|$ .

Page 33 → Table S2: Selection of 478 CpGs after comparing individuals with  $HOMA \leq 3$  and  $> 3$  (Student's t-test + Bonferroni correction).

**Table S1: Selection of 798 CpGs after linear regression by FDR<0.05 and slope  $\geq$  |0.1|.**

| CpG        | UCSC_RefGene_Accession | UCSC_RefGene_Group     | UCSC_CpG_Islands_Name | p        | FDR        |
|------------|------------------------|------------------------|-----------------------|----------|------------|
| cg22051399 | NA                     | NA                     | NA                    | 1.44E-10 | 4.90E-05   |
| cg16462528 | LECT1;LECT1            | NM_001011705;NM_007015 | Body;Body             | 4.96E-10 | 8.46E-05   |
| cg13133503 | CLCA4;CLCA4            | NR_024602;NM_012128    | Body;Body             | 2.31E-09 | 0.00026276 |
| cg13108601 | FRS3;PRICKLE4          | NM_006653;NM_013397    | TSS1500;TSS1500       | 5.88E-09 | 0.00048823 |
| cg02613818 | IGF1R                  | NM_000875              | Body                  | 7.16E-09 | 0.00048823 |
| cg19749898 | HCCA2                  | NM_053005              | Body                  | 1.14E-08 | 0.00064765 |
| cg02793828 | NA                     | NA                     | NA                    | 4.27E-08 | 0.00207921 |
| cg07638362 | NA                     | NA                     | NA                    | 5.32E-08 | 0.00226558 |
| cg14315232 | NA                     | NA                     | NA                    | 6.47E-08 | 0.00245104 |
| cg04559178 | NA                     | NA                     | NA                    | 1.72E-07 | 0.00556053 |
| cg10293354 | NA                     | NA                     | NA                    | 1.89E-07 | 0.00556053 |
| cg05935374 | RAB30                  | NM_014488              | TSS200                | 2.08E-07 | 0.00556053 |
| cg20703375 | ARPC1A                 | NM_006409              | Body                  | 2.24E-07 | 0.00556053 |
| cg19260567 | CNTNAP2                | NM_014141              | Body                  | 2.72E-07 | 0.00556053 |
| cg03806828 | RAB21                  | NM_014999              | TSS200                | 2.72E-07 | 0.00556053 |
| cg09242721 | TRNT1                  | NM_182916              | TSS200                | 2.74E-07 | 0.00556053 |
| cg22964775 | LPHN3                  | NM_015236              | TSS1500               | 3.02E-07 | 0.00556053 |
| cg07908574 | SLC45A1                | NM_001080397           | Body                  | 3.07E-07 | 0.00556053 |
| cg04238871 | FAM53B                 | NM_014661              | 5'UTR                 | 3.10E-07 | 0.00556053 |
| cg04737885 | ADCY9                  | NM_001116              | 3'UTR                 | 3.88E-07 | 0.00636839 |
| cg15924985 | NA                     | NA                     | NA                    | 3.92E-07 | 0.00636839 |
| cg04724873 | KIAA1751               | NM_001080484           | Body                  | 4.66E-07 | 0.00650242 |
| cg11390741 | ITGA9                  | NM_002207              | Body                  | 4.69E-07 | 0.00650242 |
| cg06180061 | C16orf91               | NM_001010878           | Body                  | 4.90E-07 | 0.00650242 |
| cg15236063 | SELK                   | NM_021237              | 3'UTR                 | 5.04E-07 | 0.00650242 |

|            |                       |                                                   |                                  |          |            |
|------------|-----------------------|---------------------------------------------------|----------------------------------|----------|------------|
| cg01809437 | KLHL36                | NM_024731                                         | Body                             | 5.12E-07 | 0.00650242 |
| cg08052428 | RALGDS;RALGDS         | NM_001042368;NM_006266                            | Body;1stExon                     | 5.29E-07 | 0.00650242 |
| cg19391498 | GALM                  | NM_138801                                         | TSS1500                          | 5.34E-07 | 0.00650242 |
| cg01841050 | KRT34                 | NM_021013                                         | TSS1500                          | 5.77E-07 | 0.00672909 |
| cg02902865 | DHRS3                 | NM_004753                                         | TSS1500                          | 5.92E-07 | 0.00672909 |
| cg02048674 | RPL13AP5;RPL13A       | NR_026712;NM_012423                               | Body;Body                        | 6.15E-07 | 0.00676325 |
| cg22636056 | NA                    | NA                                                | NA                               | 6.58E-07 | 0.00700489 |
| cg00459550 | NA                    | NA                                                | NA                               | 7.62E-07 | 0.00786681 |
| cg16278828 | MAN2C1                | NM_006715                                         | Body                             | 8.51E-07 | 0.00804755 |
| cg21607453 | NCRNA00092            | NR_024129                                         | Body                             | 8.91E-07 | 0.00804755 |
| cg05422174 | KIRREL3;KIRREL3       | NM_001161707;NM_032531                            | Body;Body                        | 9.20E-07 | 0.00804755 |
| cg20853880 | KLF11                 | NM_003597                                         | Body                             | 9.48E-07 | 0.00804755 |
| cg00931944 | NA                    | NA                                                | NA                               | 9.74E-07 | 0.00804755 |
| cg22870994 | NA                    | NA                                                | NA                               | 9.76E-07 | 0.00804755 |
| cg18543035 | NA                    | NA                                                | NA                               | 1.02E-06 | 0.00804755 |
| cg10400362 | AJAP1;AJAP1           | NM_018836;NM_001042478                            | Body;Body                        | 1.04E-06 | 0.00804755 |
| cg24511898 | ATG4B;ATG4B;THAP4     | NM_178326;NM_013325;NM_015963                     | TSS1500;TSS1500;TSS200           | 1.06E-06 | 0.00804755 |
| cg23162967 | CBLB                  | NM_170662                                         | TSS200                           | 1.07E-06 | 0.00804755 |
| cg06665941 | IFNAR2;IFNAR2;IFNAR2  | NM_207585;NM_207584;NM_000874                     | 5'UTR;5'UTR;5'UTR                | 1.09E-06 | 0.00804755 |
| cg20087917 | C14orf133;AHSA1       | NM_022067;NM_012111                               | TSS200;TSS1500                   | 1.09E-06 | 0.00804755 |
| cg16104446 | MCM4;MCM4;PRKDC;PRKDC | NM_182746;NM_005914;NM_001081640;NM_006904        | Body;Body;TSS1500;TSS1500        | 1.11E-06 | 0.00804755 |
| cg19450145 | TULP4;TULP4           | NM_020245;NM_001007466                            | Body;Body                        | 1.11E-06 | 0.00804755 |
| cg09984469 | CYP26B1               | NM_019885                                         | Body                             | 1.13E-06 | 0.00804755 |
| cg23104823 | PRPF39;PRPF39         | NM_017922;NM_017922                               | 1stExon;5'UTR                    | 1.20E-06 | 0.00831494 |
| cg20261243 | NCOA5                 | NM_020967                                         | TSS200                           | 1.23E-06 | 0.00831494 |
| cg11688874 | WAC;WAC;WAC;WAC;WAC   | NM_100486;NM_016628;NM_016628;NM_100486;NR_024557 | 1stExon;5'UTR;1stExon;5'UTR;Body | 1.24E-06 | 0.00831494 |

|            |                               |                                                  |                            |          |            |
|------------|-------------------------------|--------------------------------------------------|----------------------------|----------|------------|
| cg10525720 | NA                            | NA                                               | NA                         | 1.43E-06 | 0.0091724  |
| cg00472528 | NA                            | NA                                               | NA                         | 1.44E-06 | 0.0091724  |
| cg16091269 | NA                            | NA                                               | NA                         | 1.47E-06 | 0.0091724  |
| cg09392827 | NA                            | NA                                               | NA                         | 1.48E-06 | 0.0091724  |
| cg23205818 | RGS6                          | NM_004296                                        | Body                       | 1.52E-06 | 0.00923743 |
| cg02737268 | CDC25B;CDC25B;CDC25B          | NM_021873;NM_004358;NM_021872                    | Body;Body;Body             | 1.61E-06 | 0.00963584 |
| cg03160445 | LNP1;TOMM70A;LNP1             | NM_001085451;NM_014820;NM_001085451              | 5'UTR;TSS200;1stExon       | 1.73E-06 | 0.00996398 |
| cg17484877 | PTPRN2;PTPRN2;PTPRN2          | NM_002847;NM_130842;NM_130843                    | Body;Body;Body             | 1.74E-06 | 0.00996398 |
| cg08723637 | NA                            | NA                                               | NA                         | 1.75E-06 | 0.00996398 |
| cg13947929 | CRHR1;CRHR1;CRHR1;CRHR1       | NM_001145148;NM_004382;NM_001145147;NM_001145146 | Body;Body;Body;Body        | 1.89E-06 | 0.01056913 |
| cg15877295 | UBN2                          | NM_173569                                        | TSS1500                    | 1.96E-06 | 0.01078959 |
| cg11814422 | SNORD58A;RPL17;SNORD58B;RPL17 | NR_002571;NM_000985;NR_002572;NM_001035006       | TSS1500;5'UTR;TSS200;5'UTR | 2.05E-06 | 0.01109319 |
| cg22811384 | NA                            | NA                                               | NA                         | 2.21E-06 | 0.01178206 |
| cg05744073 | MIR132                        | NR_029674                                        | Body                       | 2.26E-06 | 0.01181472 |
| cg25188760 | NA                            | NA                                               | NA                         | 2.29E-06 | 0.01181472 |
| cg03227783 | HLA-DPB2                      | NR_001435                                        | Body                       | 2.42E-06 | 0.01224402 |
| cg13713052 | FAM162A;CCDC58                | NM_014367;NM_001017928                           | TSS1500;TSS200             | 2.44E-06 | 0.01224402 |
| cg24962827 | THRB;THRB;THRB                | NM_000461;NM_001128176;NM_001128177              | Body;Body;Body             | 2.53E-06 | 0.01230445 |
| cg04889221 | CCDC37                        | NM_182628                                        | Body                       | 2.54E-06 | 0.01230445 |
| cg14193886 | LIF;LIF                       | NM_002309;NM_002309                              | 5'UTR;1stExon              | 2.56E-06 | 0.01230445 |
| cg02304481 | FAM178B;FAM178B               | NM_001122646;NM_001122646                        | 5'UTR;1stExon              | 2.70E-06 | 0.01280718 |
| cg06836020 | LOC440354;LOC595101           | NR_002473;NR_002453                              | Body;Body                  | 2.83E-06 | 0.01310199 |
| cg17876831 | SLC5A10;SLC5A10               | NM_001042450;NM_152351                           | Body;Body                  | 2.84E-06 | 0.01310199 |
| cg22219795 | NA                            | NA                                               | NA                         | 2.90E-06 | 0.01310467 |
| cg21304211 | C1orf183;C1orf183;C1orf183    | NM_198926;NM_019099;NM_019099                    | Body;1stExon;5'UTR         | 2.92E-06 | 0.01310467 |
| cg09853839 | NA                            | NA                                               | NA                         | 3.04E-06 | 0.01330323 |

|            |                               |                                                                   |                               |          |            |
|------------|-------------------------------|-------------------------------------------------------------------|-------------------------------|----------|------------|
| cg19741148 | NA                            | NA                                                                | NA                            | 3.04E-06 | 0.01330323 |
| cg19597318 | NFASC;NFASC;NFASC;NFASC;NFASC | NM_015090;NM_001160333;NM_001005388;<br>NM_001005389;NM_001160332 | 5'UTR;5'UTR;5'UTR;5'UTR;5'UTR | 3.09E-06 | 0.01334721 |
| cg14156446 | NR6A1;NR6A1                   | NM_033334;NM_001489                                               | 3'UTR;3'UTR                   | 3.19E-06 | 0.01358452 |
| cg02694576 | PTDSS2                        | NM_030783                                                         | Body                          | 3.34E-06 | 0.0140408  |
| cg14044465 | NA                            | NA                                                                | NA                            | 3.40E-06 | 0.01413129 |
| cg01963897 | NA                            | NA                                                                | NA                            | 3.48E-06 | 0.01414112 |
| cg05301188 | KLF11                         | NM_003597                                                         | Body                          | 3.48E-06 | 0.01414112 |
| cg21963643 | CACNA1E                       | NM_000721                                                         | TSS1500                       | 3.61E-06 | 0.01422584 |
| cg22920258 | MCHR1                         | NM_005297                                                         | TSS1500                       | 3.62E-06 | 0.01422584 |
| cg14421779 | NA                            | NA                                                                | NA                            | 3.65E-06 | 0.01422584 |
| cg10251347 | NRD1;NRD1;NRD1;NRD1           | NM_002525;NM_002525;NM_001101662;NM_001101662                     | 5'UTR;1stExon;1stExon;5'UTR   | 3.67E-06 | 0.01422584 |
| cg22901726 | NA                            | NA                                                                | NA                            | 3.77E-06 | 0.01422584 |
| cg16783478 | GRIN2A;GRIN2A;GRIN2A          | NM_001134407;NM_000833;NM_001134408                               | Body;Body;Body                | 3.83E-06 | 0.01422584 |
| cg22341273 | HEATR7A;HEATR7A;HEATR7A       | NM_001099281;NM_001099280;NM_032450                               | Body;Body;Body                | 3.88E-06 | 0.01422584 |
| cg20752695 | NA                            | NA                                                                | NA                            | 3.89E-06 | 0.01422584 |
| cg01726103 | FAM65B                        | NM_014722                                                         | TSS1500                       | 3.89E-06 | 0.01422584 |
| cg08250273 | ST7;ST7OT4;ST7OT1;ST7         | NM_018412;NR_002329;NR_002330;NM_021908                           | TSS200;TSS1500;Body;TSS200    | 3.96E-06 | 0.01422584 |
| cg09332650 | PRR12                         | NM_020719                                                         | Body                          | 3.99E-06 | 0.01422584 |
| cg14932796 | COIL                          | NM_004645                                                         | 1stExon                       | 4.01E-06 | 0.01422584 |
| cg18358845 | ZNF454                        | NM_182594                                                         | Body                          | 4.08E-06 | 0.01432482 |
| cg13885205 | NA                            | NA                                                                | NA                            | 4.22E-06 | 0.0146651  |
| cg22081084 | LRRRC8B                       | NM_001134476                                                      | TSS200                        | 4.40E-06 | 0.0151354  |
| cg05254095 | ZDHHC7;ZDHHC7                 | NM_001145548;NM_017740                                            | 3'UTR;3'UTR                   | 4.49E-06 | 0.01513971 |
| cg04598128 | NA                            | NA                                                                | NA                            | 4.52E-06 | 0.01513971 |
| cg05093429 | TCL6                          | NR_028288                                                         | Body                          | 4.53E-06 | 0.01513971 |
| cg04948475 | UGT2A3;UGT2A3                 | NM_024743;NR_024010                                               | Body;Body                     | 4.76E-06 | 0.01568255 |

|            |                                       |                                                         |                                       |          |            |
|------------|---------------------------------------|---------------------------------------------------------|---------------------------------------|----------|------------|
| cg18062721 | VGLL4;VGLL4                           | NM_014667;NM_001128219                                  | Body;Body                             | 4.78E-06 | 0.01568255 |
| cg19545348 | RCOR3;RCOR3;RCOR3;RCOR3               | NM_018254;NM_001136224;NM_001136225;NM_001136223        | Body;Body;Body;Body                   | 5.14E-06 | 0.0166509  |
| cg17599958 | AP2A2                                 | NM_012305                                               | Body                                  | 5.18E-06 | 0.0166509  |
| cg17009526 | FAT1                                  | NM_005245                                               | Body                                  | 5.31E-06 | 0.01685222 |
| cg13241473 | TFEB;TFEB                             | NM_001167827;NM_007162                                  | 5'UTR;TSS1500                         | 5.36E-06 | 0.01685222 |
| cg10355458 | MBD3                                  | NM_003926                                               | 3'UTR                                 | 5.40E-06 | 0.01685222 |
| cg01353569 | HBP1                                  | NM_012257                                               | 5'UTR                                 | 5.44E-06 | 0.01685222 |
| cg17745433 | OBSCN;OBSCN                           | NM_052843;NM_001098623                                  | Body;Body                             | 5.51E-06 | 0.01692716 |
| cg19613905 | MNS1;MNS1                             | NM_018365;NM_018365                                     | 1stExon;5'UTR                         | 5.58E-06 | 0.01697989 |
| cg09991951 | NA                                    | NA                                                      | NA                                    | 5.73E-06 | 0.01712542 |
| cg07145255 | DEPDC1B;DEPDC1B                       | NM_018369;NM_001145208                                  | Body;Body                             | 5.78E-06 | 0.01712542 |
| cg19951269 | NA                                    | NA                                                      | NA                                    | 5.78E-06 | 0.01712542 |
| cg01223673 | INSC                                  | NM_001031853                                            | TSS200                                | 5.83E-06 | 0.01712542 |
| cg23924911 | NA                                    | NA                                                      | NA                                    | 6.26E-06 | 0.01797324 |
| cg04318006 | SNTB1                                 | NM_021021                                               | 1stExon                               | 6.27E-06 | 0.01797324 |
| cg09529537 | JMY                                   | NM_152405                                               | TSS200                                | 6.27E-06 | 0.01797324 |
| cg21757872 | BTBD11;BTBD11                         | NM_001017523;NM_001018072                               | TSS200;Body                           | 6.40E-06 | 0.01801082 |
| cg15944459 | PLA2G6;BAIAP2L2;PLA2G6                | NM_001004426;NM_025045;NM_003560                        | 3'UTR;TSS1500;3'UTR                   | 6.41E-06 | 0.01801082 |
| cg16198129 | ZNF662;ZNF662                         | NM_207404;NM_001134656                                  | Body;Body                             | 6.46E-06 | 0.01801082 |
| cg04605980 | NA                                    | NA                                                      | NA                                    | 6.58E-06 | 0.01801082 |
| cg09016822 | IER3                                  | NM_003897                                               | TSS200                                | 6.62E-06 | 0.01801082 |
| cg12402495 | C1orf43;C1orf43;UBAP2L;UBAP2L;C1orf43 | NM_015449;NM_138740;NM_014847;NM_001127320;NM_001098616 | 1stExon;1stExon;TSS1500;5'UTR;1stExon | 6.68E-06 | 0.01801082 |
| cg00584840 | NA                                    | NA                                                      | NA                                    | 6.70E-06 | 0.01801082 |
| cg24613691 | NA                                    | NA                                                      | NA                                    | 6.77E-06 | 0.01801082 |
| cg22136672 | NA                                    | NA                                                      | NA                                    | 6.80E-06 | 0.01801082 |
| cg06124975 | SOBP                                  | NM_018013                                               | TSS1500                               | 6.82E-06 | 0.01801082 |

|            |                                           |                                                                             |                                           |          |            |
|------------|-------------------------------------------|-----------------------------------------------------------------------------|-------------------------------------------|----------|------------|
| cg02804275 | NA                                        | NA                                                                          | NA                                        | 7.24E-06 | 0.01889851 |
| cg18547667 | NA                                        | NA                                                                          | NA                                        | 7.28E-06 | 0.01889851 |
| cg18654971 | MIR449C;CDC20B;CDC20B;CDC20B              | NR_031572;NM_001170402;NM_001145734;NM_152623                               | TSS1500;TSS1500;TSS1500;TSS1500           | 7.32E-06 | 0.01889851 |
| cg06936159 | ZNF707;ZNF707;ZNF707;ZNF707;ZNF707;ZNF707 | NM_001100599;NM_173831;NM_001100598;<br>NM_173831;NM_001100598;NM_001100599 | 1stExon;1stExon;1stExon;5'UTR;5'UTR;5'UTR | 7.46E-06 | 0.01912047 |
| cg18624108 | COL11A2;COL11A2;COL11A2                   | NM_080679;NM_080681;NM_080680                                               | Body;Body;Body                            | 7.60E-06 | 0.01931119 |
| cg09015484 | NA                                        | NA                                                                          | NA                                        | 7.65E-06 | 0.01931119 |
| cg23436918 | BZW2;ANKMY2;BZW2;BZW2                     | NM_001159767;NM_020319;NR_027624;NM_014038                                  | TSS200;TSS200;TSS200;TSS200               | 7.72E-06 | 0.01934502 |
| cg03531754 | FAM83A;FAM83A                             | NM_032899;NM_207006                                                         | TSS1500;TSS1500                           | 7.79E-06 | 0.01938837 |
| cg10150615 | LOC391322                                 | NM_001144931                                                                | TSS200                                    | 7.99E-06 | 0.01946077 |
| cg21838880 | ZNF461;ZNF461                             | NM_153257;NM_153257                                                         | 1stExon;5'UTR                             | 8.00E-06 | 0.01946077 |
| cg11580090 | CYB5R1                                    | NM_016243                                                                   | 3'UTR                                     | 8.05E-06 | 0.01946077 |
| cg14039479 | GPR26                                     | NM_153442                                                                   | 3'UTR                                     | 8.05E-06 | 0.01946077 |
| cg13412395 | NR4A3;NR4A3;NR4A3                         | NM_006981;NM_173198;NM_173199                                               | TSS1500;TSS1500;TSS1500                   | 8.17E-06 | 0.01961891 |
| cg15999833 | HECW1                                     | NM_015052                                                                   | Body                                      | 8.31E-06 | 0.01981871 |
| cg13507084 | CNTFR;CNTFR                               | NM_147164;NM_001842                                                         | Body;Body                                 | 8.38E-06 | 0.01983649 |
| cg03226245 | SDHAF1;SDHAF1                             | NM_001042631;NM_001042631                                                   | 1stExon;5'UTR                             | 8.64E-06 | 0.02031788 |
| cg01339558 | TIPRL;TIPRL                               | NM_001031800;NM_152902                                                      | Body;Body                                 | 8.73E-06 | 0.02036028 |
| cg00356500 | TNXB                                      | NM_019105                                                                   | Body                                      | 8.78E-06 | 0.02036028 |
| cg16139199 | ESCO1                                     | NM_052911                                                                   | 5'UTR                                     | 8.96E-06 | 0.02063552 |
| cg19932227 | ADPRH                                     | NM_001125                                                                   | TSS200                                    | 9.10E-06 | 0.02080373 |
| cg11287903 | DCLRE1A;NHLRC2;DCLRE1A                    | NM_014881;NM_198514;NM_014881                                               | 5'UTR;TSS1500;1stExon                     | 9.15E-06 | 0.02080373 |
| cg08470053 | ZNF160;ZNF160;ZNF160                      | NM_033288;NM_198893;NM_001102603                                            | 5'UTR;5'UTR;5'UTR                         | 9.40E-06 | 0.02112705 |
| cg25184507 | CYB5D1;LSMD1                              | NM_144607;NM_032356                                                         | TSS1500;Body                              | 9.42E-06 | 0.02112705 |
| cg23851043 | MOBK13;MOBK13;MOBK13                      | NM_199482;NM_001100819;NM_015387                                            | 5'UTR;Body;Body                           | 9.56E-06 | 0.02130979 |
| cg24430189 | NA                                        | NA                                                                          | NA                                        | 9.70E-06 | 0.02147522 |
| cg20584198 | STAC3                                     | NM_145064                                                                   | Body                                      | 1.00E-05 | 0.02191558 |

|            |                               |                                                                             |                               |          |            |
|------------|-------------------------------|-----------------------------------------------------------------------------|-------------------------------|----------|------------|
| cg23622695 | NA                            | NA                                                                          | NA                            | 1.00E-05 | 0.02191558 |
| cg15401862 | KCNMB4                        | NM_014505                                                                   | 3'UTR                         | 1.02E-05 | 0.022139   |
| cg13116086 | POM121L10P                    | NR_024593                                                                   | TSS1500                       | 1.03E-05 | 0.022139   |
| cg19020758 | NA                            | NA                                                                          | NA                            | 1.04E-05 | 0.02219217 |
| cg09540629 | KNDC1                         | NM_152643                                                                   | Body                          | 1.06E-05 | 0.02247626 |
| cg11110248 | MANBA                         | NM_005908                                                                   | TSS200                        | 1.07E-05 | 0.02247626 |
| cg12315590 | C3orf37;C3orf37               | NM_001006109;NM_020187                                                      | TSS1500;TSS200                | 1.07E-05 | 0.02247626 |
| cg04835971 | RASSF3                        | NM_178169                                                                   | 3'UTR                         | 1.08E-05 | 0.02250063 |
| cg09422450 | NA                            | NA                                                                          | NA                            | 1.08E-05 | 0.02251295 |
| cg21319458 | BAZ2B;BAZ2B                   | NM_013450;NM_013450                                                         | 1stExon;5'UTR                 | 1.10E-05 | 0.0225298  |
| cg13769834 | NA                            | NA                                                                          | NA                            | 1.10E-05 | 0.0225298  |
| cg00232805 | ANKRD36                       | NM_001164315                                                                | 1stExon                       | 1.12E-05 | 0.0225776  |
| cg18701983 | TNXB                          | NM_019105                                                                   | 5'UTR                         | 1.13E-05 | 0.0225776  |
| cg19306036 | GREB1                         | NM_014668                                                                   | Body                          | 1.13E-05 | 0.0225776  |
| cg22351924 | IFI6;IFI6;IFI6                | NM_022872;NM_002038;NM_022873                                               | Body;Body;Body                | 1.13E-05 | 0.0225776  |
| cg04792380 | NA                            | NA                                                                          | NA                            | 1.14E-05 | 0.0225776  |
| cg12404679 | KLHL30                        | NM_198582                                                                   | Body                          | 1.14E-05 | 0.0225776  |
| cg08458400 | CNR1;CNR1;CNR1;CNR1;CNR1;CNR1 | NM_001160259;NM_001160226;NM_001160258;<br>NM_001160260;NM_033181;NM_016083 | Body;Body;Body;Body;Body;Body | 1.15E-05 | 0.0225776  |
| cg13435243 | LRRC8A;LRRC8A;LRRC8A          | NM_001127245;NM_001127244;NM_019594                                         | Body;Body;Body                | 1.16E-05 | 0.0225776  |
| cg19094530 | NA                            | NA                                                                          | NA                            | 1.17E-05 | 0.0225776  |
| cg25235380 | ANKFY1;ANKFY1                 | NM_020740;NM_016376                                                         | TSS200;TSS200                 | 1.17E-05 | 0.0225776  |
| cg00004939 | C14orf181;C14orf181           | NM_207442;NM_207442                                                         | 3'UTR;1stExon                 | 1.17E-05 | 0.0225776  |
| cg02326858 | ZNF687                        | NM_020832                                                                   | TSS1500                       | 1.18E-05 | 0.0225776  |
| cg00997699 | PLXNA2                        | NM_025179                                                                   | Body                          | 1.19E-05 | 0.0226536  |
| cg00031105 | RXR8                          | NM_021976                                                                   | Body                          | 1.20E-05 | 0.0226536  |
| cg00832650 | FLNC;FLNC                     | NM_001127487;NM_001458                                                      | Body;Body                     | 1.22E-05 | 0.02290126 |



|            |                                                                                                                                     |                                                                                                                                                               |                                                                                     |          |            |
|------------|-------------------------------------------------------------------------------------------------------------------------------------|---------------------------------------------------------------------------------------------------------------------------------------------------------------|-------------------------------------------------------------------------------------|----------|------------|
| cg21683619 | LEPR;LEPR;LEPR                                                                                                                      | NM_001003679;NM_002303;NM_001003680                                                                                                                           | Body;Body;Body                                                                      | 1.23E-05 | 0.02290126 |
| cg11327366 | FAM189A1                                                                                                                            | NM_015307                                                                                                                                                     | Body                                                                                | 1.23E-05 | 0.02290126 |
| cg21689228 | MSX1                                                                                                                                | NM_002448                                                                                                                                                     | TSS1500                                                                             | 1.24E-05 | 0.02290126 |
| cg00455514 | NA                                                                                                                                  | NA                                                                                                                                                            | NA                                                                                  | 1.24E-05 | 0.02290126 |
| cg23219925 | NA                                                                                                                                  | NA                                                                                                                                                            | NA                                                                                  | 1.25E-05 | 0.02299412 |
| cg10581632 | CDK2;CDK2;CDK2;SILV;CDK2                                                                                                            | NM_052827;NM_001798;NM_001798;NM_006928;NM_052827                                                                                                             | 5'UTR;1stExon;5'UTR;TSS1500;1stExon                                                 | 1.28E-05 | 0.02308375 |
| cg00410419 | COMMD6;COMMD6                                                                                                                       | NM_203497;NM_203495                                                                                                                                           | Body;Body                                                                           | 1.28E-05 | 0.02308375 |
| cg08531746 | ATP11A;ATP11A                                                                                                                       | NM_015205;NM_032189                                                                                                                                           | Body;Body                                                                           | 1.28E-05 | 0.02308375 |
| cg18784586 | GPRC5A;GPRC5A                                                                                                                       | NM_003979;NM_003979                                                                                                                                           | 1stExon;5'UTR                                                                       | 1.29E-05 | 0.02308375 |
| cg17361449 | TTPAL;TTPAL                                                                                                                         | NM_001039199;NM_024331                                                                                                                                        | TSS200;TSS200                                                                       | 1.34E-05 | 0.02377131 |
| cg23182539 | TIAL1;TIAL1                                                                                                                         | NM_001033925;NM_003252                                                                                                                                        | Body;Body                                                                           | 1.34E-05 | 0.02377131 |
| cg19964273 | NA                                                                                                                                  | NA                                                                                                                                                            | NA                                                                                  | 1.35E-05 | 0.02377131 |
| cg11906607 | GNG7                                                                                                                                | NM_052847                                                                                                                                                     | 5'UTR                                                                               | 1.36E-05 | 0.02377131 |
| cg15084903 | THEG;THEG                                                                                                                           | NM_016585;NM_199202                                                                                                                                           | TSS200;TSS200                                                                       | 1.36E-05 | 0.02377131 |
| cg25256723 | F5                                                                                                                                  | NM_000130                                                                                                                                                     | TSS200                                                                              | 1.38E-05 | 0.02391311 |
| cg17794996 | C6orf48;C6orf48                                                                                                                     | NM_001040438;NM_001040437                                                                                                                                     | Body;Body                                                                           | 1.38E-05 | 0.02391311 |
| cg24002010 | TMEM86B;SAPS1                                                                                                                       | NM_173804;NM_014931                                                                                                                                           | TSS1500;3'UTR                                                                       | 1.39E-05 | 0.02391311 |
| cg03649497 | CACNA1G;CACNA1G;CACNA1G;CACNA1G;CACNA1G;<br>CACNA1G;<br>CACNA1G;CACNA1G;CACNA1G;CACNA1G;CACNA1G;<br>CACNA1G;CACNA1G;CACNA1G;CACNA1G | NM_198384;NM_198379;NM_198380;NM_198377;<br>NM_198385;NM_018896;NM_198396;NM_198386;NM_198376;NM_19<br>8397;NM_198388;NM_198383;NM_198382;NM_198378;NM_198387 | Body;Body;Body;Body;Body;Body;Body;Body;Body;<br>Body;Body;Body;Body;Body;Body;Body | 1.41E-05 | 0.02422014 |
| cg08980198 | NA                                                                                                                                  | NA                                                                                                                                                            | NA                                                                                  | 1.42E-05 | 0.02422014 |
| cg17983632 | NA                                                                                                                                  | NA                                                                                                                                                            | NA                                                                                  | 1.44E-05 | 0.02448221 |
| cg04618340 | NA                                                                                                                                  | NA                                                                                                                                                            | NA                                                                                  | 1.46E-05 | 0.02464946 |
| cg05177851 | EIF2B3;EIF2B3                                                                                                                       | NM_001166588;NM_020365                                                                                                                                        | 5'UTR;5'UTR                                                                         | 1.47E-05 | 0.02472716 |
| cg00170564 | BTBD11                                                                                                                              | NM_001018072                                                                                                                                                  | Body                                                                                | 1.49E-05 | 0.0248262  |
| cg20009378 | GRK1                                                                                                                                | NM_002929                                                                                                                                                     | Body                                                                                | 1.49E-05 | 0.02485361 |
| cg16275967 | NDUFS2;NDUFS2                                                                                                                       | NM_004550;NM_001166159                                                                                                                                        | Body;1stExon                                                                        | 1.51E-05 | 0.02489702 |

|            |                               |                                                            |                          |          |            |
|------------|-------------------------------|------------------------------------------------------------|--------------------------|----------|------------|
| cg04772948 | LOC284788;LOC284788           | NR_027090;NR_027089                                        | TSS200;TSS200            | 1.51E-05 | 0.02489702 |
| cg02582774 | COQ5                          | NM_032314                                                  | Body                     | 1.53E-05 | 0.02510443 |
| cg21850852 | ITGB4;ITGB4;ITGB4             | NM_001005731;NM_001005619;NM_000213                        | Body;Body;Body           | 1.54E-05 | 0.02518711 |
| cg00570269 | C13orf33                      | NM_032849                                                  | Body                     | 1.56E-05 | 0.02536814 |
| cg24769972 | AP2A2                         | NM_012305                                                  | Body                     | 1.58E-05 | 0.02536814 |
| cg05573182 | MAFB                          | NM_005461                                                  | TSS1500                  | 1.58E-05 | 0.02536814 |
| cg03438024 | NA                            | NA                                                         | NA                       | 1.59E-05 | 0.02536814 |
| cg12393716 | TTC9C;HNRNPUL2                | NM_173810;NM_001079559                                     | TSS1500;TSS1500          | 1.60E-05 | 0.02555559 |
| cg13116438 | STK19;STK19;DOM3Z;STK19       | NM_004197;NM_032454;NM_005510;NR_026717                    | Body;Body;TSS1500;Body   | 1.62E-05 | 0.02555559 |
| cg08664652 | GOSR1;GOSR1;GOSR1             | NM_001007024;NM_004871;NM_001007025                        | TSS200;TSS200;TSS200     | 1.62E-05 | 0.02555559 |
| cg03771840 | TRIM15                        | NM_033229                                                  | 3'UTR                    | 1.63E-05 | 0.02555559 |
| cg03399598 | GALNT7                        | NM_017423                                                  | Body                     | 1.66E-05 | 0.02566003 |
| cg07306531 | ZNF75A                        | NM_153028                                                  | TSS200                   | 1.66E-05 | 0.02566003 |
| cg22523851 | NA                            | NA                                                         | NA                       | 1.66E-05 | 0.02566003 |
| cg22753607 | ZCCHC7                        | NM_032226                                                  | TSS200                   | 1.67E-05 | 0.02566003 |
| cg04517374 | CABLES2                       | NM_031215                                                  | Body                     | 1.69E-05 | 0.02566003 |
| cg08977639 | NA                            | NA                                                         | NA                       | 1.69E-05 | 0.02566003 |
| cg24545908 | NA                            | NA                                                         | NA                       | 1.69E-05 | 0.02566003 |
| cg09198968 | NA                            | NA                                                         | NA                       | 1.72E-05 | 0.02566003 |
| cg00017601 | PTK2B;PTK2B;PTK2B;PTK2B       | NM_173176;NM_173175;NM_173174;NM_004103                    | Body;Body;Body;Body      | 1.73E-05 | 0.02566003 |
| cg20847018 | NA                            | NA                                                         | NA                       | 1.73E-05 | 0.02566003 |
| cg15649111 | CPA5;CPA5;CPA5                | NM_001127441;NM_001127442;NM_080385                        | Body;Body;Body           | 1.74E-05 | 0.02566003 |
| cg21473183 | GNLY;GNLY                     | NM_006433;NM_012483                                        | 3'UTR;3'UTR              | 1.74E-05 | 0.02566003 |
| cg15772133 | LTBP1;LTBP1;LTBP1;LTBP1;LTBP1 | NM_000627;NM_206943;NM_001166265;NM_001166266;NM_001166264 | Body;Body;Body;Body;Body | 1.75E-05 | 0.02566003 |
| cg02133350 | PMS2;PMS2                     | NM_000535;NR_003085                                        | Body;Body                | 1.76E-05 | 0.02566003 |
| cg10857489 | SLC12A7                       | NM_006598                                                  | Body                     | 1.77E-05 | 0.02566003 |

|            |                                           |                                                                                       |                                                      |          |            |
|------------|-------------------------------------------|---------------------------------------------------------------------------------------|------------------------------------------------------|----------|------------|
| cg01652215 | TPRKB                                     | NM_016058                                                                             | 5'UTR                                                | 1.77E-05 | 0.02566003 |
| cg23475244 | NA                                        | NA                                                                                    | NA                                                   | 1.77E-05 | 0.02566003 |
| cg13556079 | NA                                        | NA                                                                                    | NA                                                   | 1.78E-05 | 0.02566003 |
| cg06932451 | NA                                        | NA                                                                                    | NA                                                   | 1.79E-05 | 0.02566003 |
| cg18246640 | NA                                        | NA                                                                                    | NA                                                   | 1.80E-05 | 0.02566003 |
| cg03414134 | BCL6                                      | NM_001706                                                                             | 5'UTR                                                | 1.80E-05 | 0.02566003 |
| cg02895995 | PEX11G                                    | NM_080662                                                                             | TSS200                                               | 1.81E-05 | 0.02566003 |
| cg20376082 | NA                                        | NA                                                                                    | NA                                                   | 1.81E-05 | 0.02566003 |
| cg08145495 | FUT6;FUT6                                 | NM_001040701;NM_000150                                                                | 5'UTR;5'UTR                                          | 1.82E-05 | 0.02575763 |
| cg23061412 | MIR518A2                                  | NR_030213                                                                             | Body                                                 | 1.84E-05 | 0.02575763 |
| cg00986762 | PSMB2;PSMB2                               | NM_002794;NM_002794                                                                   | 1stExon;5'UTR                                        | 1.85E-05 | 0.02575763 |
| cg15603885 | ABRA                                      | NM_139166                                                                             | 1stExon                                              | 1.87E-05 | 0.02575763 |
| cg17169613 | RALB                                      | NM_002881                                                                             | TSS1500                                              | 1.87E-05 | 0.02575763 |
| cg16639311 | NA                                        | NA                                                                                    | NA                                                   | 1.87E-05 | 0.02575763 |
| cg00464757 | NA                                        | NA                                                                                    | NA                                                   | 1.88E-05 | 0.02575763 |
| cg23991169 | PCGF3                                     | NM_006315                                                                             | Body                                                 | 1.88E-05 | 0.02575763 |
| cg22510662 | CSorf33;CSorf33                           | NM_001085411;NM_153013                                                                | Body;Body                                            | 1.88E-05 | 0.02575763 |
| cg17851061 | GREB1                                     | NM_014668                                                                             | Body                                                 | 1.90E-05 | 0.02575763 |
| cg11208039 | ZDHHC13;ZDHHC13;ZDHHC13;ZDHHC13           | NM_001001483;NM_019028;NM_001001483;NM_019028                                         | 1stExon;5'UTR;5'UTR;1stExon                          | 1.90E-05 | 0.02575763 |
| cg19407545 | NA                                        | NA                                                                                    | NA                                                   | 1.90E-05 | 0.02575763 |
| cg14457132 | CAGE1;CAGE1;CAGE1;CAGE1;CAGE1;CAGE1;RIOK1 | NM_001170693;NM_001170693;NM_001170692;<br>NM_205864;NM_001170692;NM_205864;NM_031480 | 1stExon;5'UTR;5'UTR;1stExon;1stExon;5'UTR;<br>TSS200 | 1.93E-05 | 0.02590812 |
| cg02668984 | PDK2                                      | NM_002611                                                                             | TSS1500                                              | 1.93E-05 | 0.02590812 |
| cg00090197 | TMEM125                                   | NM_144626                                                                             | Body                                                 | 1.96E-05 | 0.02622581 |
| cg23219933 | NA                                        | NA                                                                                    | NA                                                   | 1.97E-05 | 0.02628317 |
| cg15966151 | NROB2                                     | NM_021969                                                                             | Body                                                 | 2.03E-05 | 0.02689168 |
| cg12652780 | PPFIA1;PPFIA1                             | NM_003626;NM_177423                                                                   | Body;Body                                            | 2.05E-05 | 0.02689168 |

|            |                      |                                  |                      |          |            |
|------------|----------------------|----------------------------------|----------------------|----------|------------|
| cg00402074 | GPR116;GPR116        | NM_001098518;NM_015234           | TSS200;5'UTR         | 2.06E-05 | 0.02689168 |
| cg11565042 | GPR45                | NM_007227                        | 1stExon              | 2.06E-05 | 0.02689168 |
| cg06778713 | NA                   | NA                               | NA                   | 2.06E-05 | 0.02689168 |
| cg24433586 | C17orf56             | NM_144679                        | Body                 | 2.07E-05 | 0.02689168 |
| cg16925003 | PXDN                 | NM_012293                        | Body                 | 2.07E-05 | 0.02689168 |
| cg22312050 | NA                   | NA                               | NA                   | 2.10E-05 | 0.02710287 |
| cg20891622 | WDR82;MIRLET7G       | NM_025222;NR_029660              | Body;TSS1500         | 2.11E-05 | 0.02714968 |
| cg00638021 | COL1A1               | NM_000088                        | Body                 | 2.14E-05 | 0.0271911  |
| cg11596580 | PRMT8;PRMT8          | NM_019854;NM_019854              | 1stExon;5'UTR        | 2.14E-05 | 0.0271911  |
| cg17321888 | NA                   | NA                               | NA                   | 2.14E-05 | 0.0271911  |
| cg06580551 | ZNF662;ZNF662;ZNF662 | NM_001134656;NM_207404;NM_207404 | TSS200;5'UTR;1stExon | 2.15E-05 | 0.0271911  |
| cg05318427 | KCMF1                | NM_020122                        | Body                 | 2.18E-05 | 0.02752757 |
| cg13701509 | NPM1;NPM1;NPM1       | NM_002520;NM_199185;NM_001037738 | Body;Body;3'UTR      | 2.19E-05 | 0.02752757 |
| cg07835232 | DENND2A              | NM_015689                        | TSS1500              | 2.20E-05 | 0.02752757 |
| cg10505024 | KEAP1;KEAP1          | NM_203500;NM_012289              | Body;Body            | 2.21E-05 | 0.02754768 |
| cg19819135 | SFRS11               | NM_004768                        | Body                 | 2.26E-05 | 0.02807133 |
| cg09379601 | DNASE2;DNASE2        | NM_001375;NM_001375              | 5'UTR;1stExon        | 2.27E-05 | 0.02810405 |
| cg03312366 | NA                   | NA                               | NA                   | 2.28E-05 | 0.02819937 |
| cg07031551 | ARAP1                | NM_001040118                     | 5'UTR                | 2.32E-05 | 0.02851273 |
| cg02883247 | KIRREL3;KIRREL3      | NM_001161707;NM_032531           | Body;Body            | 2.33E-05 | 0.02857483 |
| cg00882175 | NA                   | NA                               | NA                   | 2.36E-05 | 0.02870993 |
| cg12484590 | NA                   | NA                               | NA                   | 2.36E-05 | 0.02870993 |
| cg00617292 | TNXB                 | NM_019105                        | Body                 | 2.37E-05 | 0.02880934 |
| cg00097968 | RPTN                 | NM_001122965                     | 3'UTR                | 2.39E-05 | 0.02886096 |
| cg14464244 | MAGI2                | NM_012301                        | TSS200               | 2.43E-05 | 0.02920494 |
| cg14840863 | COLEC11;COLEC11      | NM_024027;NM_199235              | Body;Body            | 2.43E-05 | 0.02920494 |

|            |                         |                                                                             |                                           |          |            |
|------------|-------------------------|-----------------------------------------------------------------------------|-------------------------------------------|----------|------------|
| cg16974379 | ZNF248                  | NM_021045                                                                   | TSS200                                    | 2.47E-05 | 0.02954878 |
| cg13436417 | PPAPDC1A                | NM_001030059                                                                | Body                                      | 2.48E-05 | 0.02957784 |
| cg22627950 | TMED4                   | NM_182547                                                                   | TSS1500                                   | 2.50E-05 | 0.02962882 |
| cg13129888 | EYA3;EYA3               | NM_001990;NM_001990                                                         | 1stExon;5'UTR                             | 2.50E-05 | 0.02962882 |
| cg03871124 | NA                      | NA                                                                          | NA                                        | 2.51E-05 | 0.02962882 |
| cg13238876 | NA                      | NA                                                                          | NA                                        | 2.52E-05 | 0.02965273 |
| cg15985509 | ZNF444                  | NM_018337                                                                   | Body                                      | 2.58E-05 | 0.03017098 |
| cg24146685 | MOGAT3                  | NM_178176                                                                   | TSS1500                                   | 2.58E-05 | 0.03017098 |
| cg12438413 | RARA;RARA;RARA;RARA     | NM_001145301;NM_000964;NM_001024809;NM_001145302                            | Body;Body;Body;Body                       | 2.61E-05 | 0.0303575  |
| cg11057205 | NA                      | NA                                                                          | NA                                        | 2.62E-05 | 0.03038824 |
| cg17460597 | NA                      | NA                                                                          | NA                                        | 2.63E-05 | 0.03040669 |
| cg03758392 | C3orf70                 | NM_001025266                                                                | Body                                      | 2.65E-05 | 0.03043986 |
| cg13265914 | REEP4                   | NM_025232                                                                   | TSS200                                    | 2.65E-05 | 0.03043986 |
| cg01176329 | GABBR1;GABBR1;GABBR1    | NM_021904;NM_021903;NM_001470                                               | Body;Body;Body                            | 2.67E-05 | 0.03049282 |
| cg19240857 | LY6G6E;LY6G6E;LY6G6D    | NR_003673;NR_024541;NM_021246                                               | TSS1500;TSS1500;TSS200                    | 2.68E-05 | 0.03049282 |
| cg12739914 | NA                      | NA                                                                          | NA                                        | 2.68E-05 | 0.03049282 |
| cg11530914 | FHOD1;SLC9A5            | NM_013241;NM_004594                                                         | TSS200;TSS1500                            | 2.71E-05 | 0.03069211 |
| cg20980271 | CLCC1;CLCC1             | NM_001048210;NM_015127                                                      | TSS1500;TSS1500                           | 2.79E-05 | 0.03138837 |
| cg02906787 | SHC1;SHC1;CKS1B;CKS1B   | NM_001130041;NM_003029;NR_024163;NM_001826                                  | TSS1500;TSS1500;Body;Body                 | 2.80E-05 | 0.03138837 |
| cg13442432 | NA                      | NA                                                                          | NA                                        | 2.80E-05 | 0.03138837 |
| cg08204369 | HN1;HN1;HN1;HN1;HN1;HN1 | NM_001002033;NM_001002032;NM_001002032;<br>NM_016185;NM_001002033;NM_016185 | 5'UTR;5'UTR;1stExon;5'UTR;1stExon;1stExon | 2.83E-05 | 0.03138837 |
| cg02841941 | P2RY1                   | NM_002563                                                                   | TSS200                                    | 2.84E-05 | 0.03138837 |
| cg24975723 | SCARNA9;KIAA1731        | NR_002569;NM_033395                                                         | TSS1500;Body                              | 2.84E-05 | 0.03138837 |
| cg21239511 | C7orf50;C7orf50;C7orf50 | NM_001134395;NM_032350;NM_001134396                                         | Body;Body;Body                            | 2.84E-05 | 0.03138837 |
| cg24486518 | NCAN                    | NM_004386                                                                   | Body                                      | 2.85E-05 | 0.03138837 |
| cg22748470 | SLC25A2                 | NM_031947                                                                   | TSS1500                                   | 2.86E-05 | 0.03138837 |

|            |                                  |                                                         |                                    |          |            |
|------------|----------------------------------|---------------------------------------------------------|------------------------------------|----------|------------|
| cg08438435 | APBA2;APBA2                      | NM_001130414;NM_005503                                  | Body;Body                          | 2.86E-05 | 0.03138837 |
| cg21939482 | C7orf70                          | NM_001037163                                            | 5'UTR                              | 2.88E-05 | 0.03152276 |
| cg16066544 | AOC3                             | NM_003734                                               | 1stExon                            | 2.91E-05 | 0.03170243 |
| cg17746791 | PIM1                             | NM_002648                                               | TSS200                             | 2.96E-05 | 0.03187504 |
| cg01332882 | ZNF1                             | NM_021035                                               | Body                               | 2.96E-05 | 0.03187504 |
| cg23003225 | NA                               | NA                                                      | NA                                 | 2.96E-05 | 0.03187504 |
| cg22249386 | MYH13                            | NM_003802                                               | Body                               | 2.96E-05 | 0.03187504 |
| cg03705947 | GADD45A                          | NM_001924                                               | Body                               | 3.00E-05 | 0.03213598 |
| cg09981884 | TMEM129;TMEM129                  | NM_138385;NM_001127266                                  | Body;Body                          | 3.02E-05 | 0.03224899 |
| cg08274380 | GPSM2                            | NM_013296                                               | TSS200                             | 3.06E-05 | 0.03252926 |
| cg16276063 | SOX2OT                           | NR_004053                                               | Body                               | 3.06E-05 | 0.03252926 |
| cg23789977 | NA                               | NA                                                      | NA                                 | 3.10E-05 | 0.03269784 |
| cg08370718 | DTWD1;DTWD1;DTWD1;DTWD1;C15orf33 | NM_020234;NM_001144955;NM_001144955;NM_020234;NM_152647 | 1stExon;1stExon;5'UTR;5'UTR;TSS200 | 3.10E-05 | 0.03269784 |
| cg09878914 | BAT1;BAT1                        | NM_080598;NM_004640                                     | Body;Body                          | 3.12E-05 | 0.03281818 |
| cg00366594 | MIR527                           | NR_030219                                               | TSS1500                            | 3.15E-05 | 0.03292777 |
| cg18669135 | NA                               | NA                                                      | NA                                 | 3.15E-05 | 0.03292777 |
| cg10211518 | POLRMT                           | NM_005035                                               | TSS200                             | 3.16E-05 | 0.03292777 |
| cg07612978 | C4orf50                          | NM_207405                                               | TSS1500                            | 3.21E-05 | 0.03323497 |
| cg15244101 | NA                               | NA                                                      | NA                                 | 3.21E-05 | 0.03323497 |
| cg21511036 | IRS1                             | NM_005544                                               | TSS200                             | 3.23E-05 | 0.03333952 |
| cg02021157 | KCNQ1;KCNQ1                      | NM_000218;NM_181798                                     | Body;Body                          | 3.27E-05 | 0.03364673 |
| cg01185801 | MALAT1                           | NR_002819                                               | Body                               | 3.28E-05 | 0.03364673 |
| cg00397871 | CCDC129                          | NM_194300                                               | 3'UTR                              | 3.31E-05 | 0.03392809 |
| cg23593986 | MIR499;MYH7B                     | NR_030223;NM_020884                                     | TSS1500;Body                       | 3.34E-05 | 0.03398395 |
| cg07127103 | MAPK1IP1L                        | NM_144578                                               | TSS1500                            | 3.36E-05 | 0.03398395 |
| cg10926047 | GFM1                             | NM_024996                                               | TSS200                             | 3.36E-05 | 0.03398395 |

|            |                                              |                                                               |                               |          |            |
|------------|----------------------------------------------|---------------------------------------------------------------|-------------------------------|----------|------------|
| cg20038204 | SETBP1                                       | NM_015559                                                     | Body                          | 3.39E-05 | 0.03398395 |
| cg00309965 | ECSCR                                        | NM_001077693                                                  | TSS200                        | 3.39E-05 | 0.03398395 |
| cg18934822 | SKI                                          | NM_003036                                                     | Body                          | 3.40E-05 | 0.03398395 |
| cg05335473 | NA                                           | NA                                                            | NA                            | 3.40E-05 | 0.03398395 |
| cg21687563 | TTC28                                        | NM_001145418                                                  | Body                          | 3.40E-05 | 0.03398395 |
| cg22530146 | ZNF469                                       | NM_001127464                                                  | Body                          | 3.41E-05 | 0.03398395 |
| cg21864616 | NA                                           | NA                                                            | NA                            | 3.42E-05 | 0.03398395 |
| cg17400701 | AGAP1;AGAP1                                  | NM_014914;NM_001037131                                        | Body;Body                     | 3.43E-05 | 0.03398395 |
| cg07312954 | DENND4B                                      | NM_014856                                                     | Body                          | 3.44E-05 | 0.03398395 |
| cg20186995 | NA                                           | NA                                                            | NA                            | 3.46E-05 | 0.03403432 |
| cg07650554 | SEPHS2                                       | NM_012248                                                     | TSS200                        | 3.47E-05 | 0.03403432 |
| cg19881032 | SLC16A8                                      | NM_013356                                                     | TSS200                        | 3.49E-05 | 0.03403432 |
| cg12616745 | MFSD6                                        | NM_017694                                                     | TSS200                        | 3.50E-05 | 0.03403432 |
| cg11851429 | CYB561D1;CYB561D1;CYB561D1;CYB561D1;CYB561D1 | NM_001134404;NM_001134402;NM_182580;NM_001134403;NM_001134400 | Body;Body;Body;Body;Body      | 3.50E-05 | 0.03403432 |
| cg02180424 | MDGA2                                        | NM_001113498                                                  | Body                          | 3.51E-05 | 0.03403432 |
| cg07395907 | NA                                           | NA                                                            | NA                            | 3.52E-05 | 0.03403432 |
| cg06609415 | NA                                           | NA                                                            | NA                            | 3.53E-05 | 0.03403432 |
| cg14771734 | ZFYVE16;ZFYVE16                              | NM_014733;NM_001105251                                        | TSS200;TSS200                 | 3.53E-05 | 0.03403432 |
| cg02896926 | AKNAD1                                       | NM_152763                                                     | 5'UTR                         | 3.62E-05 | 0.0345772  |
| cg10901867 | NAT8L                                        | NM_178557                                                     | Body                          | 3.65E-05 | 0.0345772  |
| cg16925090 | KIAA1377;ANGPTL5                             | NM_020802;NM_178127                                           | TSS1500;5'UTR                 | 3.66E-05 | 0.0345772  |
| cg13441112 | NA                                           | NA                                                            | NA                            | 3.66E-05 | 0.0345772  |
| cg00160828 | NA                                           | NA                                                            | NA                            | 3.66E-05 | 0.0345772  |
| cg19294931 | TTBK1                                        | NM_032538                                                     | Body                          | 3.66E-05 | 0.0345772  |
| cg04132851 | SSX2IP;SSX2IP;SSX2IP;SSX2IP;SSX2IP           | NM_001166294;NM_001166417;NM_001166295;NM_001166293;NM_014021 | 5'UTR;5'UTR;5'UTR;5'UTR;5'UTR | 3.66E-05 | 0.0345772  |
| cg17422427 | RNPEPL1                                      | NM_018226                                                     | TSS1500                       | 3.68E-05 | 0.0345772  |

|            |                    |                               |                 |          |            |
|------------|--------------------|-------------------------------|-----------------|----------|------------|
| cg03133917 | RBM33              | NM_053043                     | TSS1500         | 3.68E-05 | 0.0345772  |
| cg23784907 | PATL1              | NM_152716                     | TSS200          | 3.71E-05 | 0.03470613 |
| cg21466107 | GLI3               | NM_000168                     | Body            | 3.72E-05 | 0.03470613 |
| cg02051981 | PAPPA2;PAPPA2      | NM_021936;NM_020318           | TSS200;TSS200   | 3.73E-05 | 0.03470613 |
| cg13551841 | EHMT1              | NM_024757                     | Body            | 3.78E-05 | 0.03498656 |
| cg20412283 | DDAH2              | NM_013974                     | 5'UTR           | 3.80E-05 | 0.03501512 |
| cg01078248 | NDUFA5             | NM_005000                     | Body            | 3.81E-05 | 0.03501512 |
| cg17408923 | RANBP2             | NM_006267                     | TSS200          | 3.81E-05 | 0.03501512 |
| cg06734816 | NT5DC1             | NM_152729                     | Body            | 3.85E-05 | 0.03510821 |
| cg03811519 | NUP214             | NM_005085                     | Body            | 3.85E-05 | 0.03510821 |
| cg11752440 | DYNC2H1;DYNC2H1    | NM_001080463;NM_001377        | 1stExon;1stExon | 3.85E-05 | 0.03510821 |
| cg19255333 | PEMT;PEMT;PEMT     | NM_148172;NM_148173;NM_007169 | Body;Body;Body  | 3.88E-05 | 0.03521699 |
| cg06167524 | NA                 | NA                            | NA              | 3.88E-05 | 0.03521699 |
| cg00598758 | TBX20;TBX20        | NM_001166220;NM_001077653     | Body;Body       | 3.91E-05 | 0.03532342 |
| cg22535057 | LHFPL4             | NM_198560                     | 3'UTR           | 3.92E-05 | 0.03532342 |
| cg16466065 | LOC388428          | NR_027255                     | Body            | 3.95E-05 | 0.03556768 |
| cg06128509 | KIF20B             | NM_016195                     | 5'UTR           | 4.01E-05 | 0.03597064 |
| cg02541778 | NA                 | NA                            | NA              | 4.03E-05 | 0.03597064 |
| cg04324509 | PCNP               | NM_020357                     | Body            | 4.03E-05 | 0.03597064 |
| cg11181726 | NA                 | NA                            | NA              | 4.05E-05 | 0.03597064 |
| cg10508347 | SLC45A1            | NM_001080397                  | 1stExon         | 4.06E-05 | 0.03597064 |
| cg13948074 | C1orf220;C1orf220  | NM_207467;NR_033186           | TSS1500;TSS1500 | 4.07E-05 | 0.03597064 |
| cg12183549 | LOC221710;HERV-FRD | NM_001135575;NM_207582        | Body;TSS200     | 4.08E-05 | 0.03597064 |
| cg13917004 | RABAC1             | NM_006423                     | Body            | 4.08E-05 | 0.03597064 |
| cg14041194 | TRAF2              | NM_021138                     | Body            | 4.10E-05 | 0.03606672 |
| cg14099160 | SEC63              | NM_007214                     | TSS1500         | 4.13E-05 | 0.03620622 |



|            |                                     |                                                                 |                               |          |            |
|------------|-------------------------------------|-----------------------------------------------------------------|-------------------------------|----------|------------|
| cg14028671 | NPDC1                               | NM_015392                                                       | Body                          | 4.17E-05 | 0.0364008  |
| cg11355319 | LYSMD3                              | NM_198273                                                       | 5'UTR                         | 4.17E-05 | 0.0364008  |
| cg03584693 | RG9MTD1                             | NM_017819                                                       | TSS1500                       | 4.19E-05 | 0.03642409 |
| cg02194842 | NA                                  | NA                                                              | NA                            | 4.23E-05 | 0.03665554 |
| cg01206944 | ATP10A                              | NM_024490                                                       | Body                          | 4.29E-05 | 0.03699582 |
| cg19762797 | NA                                  | NA                                                              | NA                            | 4.30E-05 | 0.03699582 |
| cg11024682 | SREBF1;SREBF1                       | NM_004176;NM_001005291                                          | Body;Body                     | 4.30E-05 | 0.03699582 |
| cg06231385 | FOXK1                               | NM_001037165                                                    | Body                          | 4.31E-05 | 0.03699582 |
| cg04217096 | KANK4                               | NM_181712                                                       | TSS1500                       | 4.36E-05 | 0.03730546 |
| cg03301075 | MRGPRE                              | NM_001039165                                                    | TSS1500                       | 4.37E-05 | 0.03730546 |
| cg00830435 | NA                                  | NA                                                              | NA                            | 4.44E-05 | 0.03763528 |
| cg06500161 | ABCG1;ABCG1;ABCG1;ABCG1;ABCG1;ABCG1 | NM_207628;NM_004915;NM_207174;<br>NM_207627;NM_016818;NM_207629 | Body;Body;Body;Body;Body;Body | 4.45E-05 | 0.03763528 |
| cg07036918 | SCUBE2;SCUBE2                       | NM_001170690;NM_020974                                          | TSS200;TSS200                 | 4.46E-05 | 0.03763528 |
| cg03609216 | TRIM15                              | NM_033229                                                       | 1stExon                       | 4.46E-05 | 0.03763528 |
| cg10379653 | TBC1D1;PTTG2                        | NM_015173;NM_006607                                             | Body;1stExon                  | 4.48E-05 | 0.03763528 |
| cg05104581 | ACSF3;ACSF3;ACSF3                   | NR_023316;NM_001127214;NM_174917                                | Body;5'UTR;5'UTR              | 4.49E-05 | 0.03763528 |
| cg22236894 | YTHDF3;YTHDF3                       | NM_152758;NM_152758                                             | 1stExon;5'UTR                 | 4.52E-05 | 0.03763528 |
| cg21532334 | NA                                  | NA                                                              | NA                            | 4.52E-05 | 0.03763528 |
| cg14147105 | FAM125A                             | NM_138401                                                       | Body                          | 4.53E-05 | 0.03763528 |
| cg04266929 | NA                                  | NA                                                              | NA                            | 4.54E-05 | 0.03763528 |
| cg09311052 | UBE2Q1                              | NM_017582                                                       | TSS1500                       | 4.54E-05 | 0.03763528 |
| cg15891747 | KLHL12;KLHL12                       | NM_021633;NM_021633                                             | 5'UTR;1stExon                 | 4.58E-05 | 0.03763528 |
| cg12946524 | FNDC3B;FNDC3B                       | NM_022763;NM_001135095                                          | TSS200;TSS1500                | 4.58E-05 | 0.03763528 |
| cg10727660 | AGAP3                               | NM_031946                                                       | Body                          | 4.59E-05 | 0.03763528 |
| cg17461336 | CYP3A43;CYP3A43;CYP3A43             | NM_022820;NM_057096;NM_057095                                   | Body;Body;Body                | 4.60E-05 | 0.03763528 |
| cg16163382 | NA                                  | NA                                                              | NA                            | 4.61E-05 | 0.03763528 |

|            |                         |                                     |                     |          |            |
|------------|-------------------------|-------------------------------------|---------------------|----------|------------|
| cg02043585 | PIGN;PIGN;KIAA1468      | NM_176787;NM_012327;NM_020854       | 5'UTR;5'UTR;TSS1500 | 4.63E-05 | 0.03763528 |
| cg11755407 | EML3;MTA2               | NM_153265;NM_004739                 | Body;TSS1500        | 4.63E-05 | 0.03763528 |
| cg13733010 | ZNF716                  | NM_001159279                        | 3'UTR               | 4.64E-05 | 0.03763528 |
| cg17633683 | SLC6A18                 | NM_182632                           | TSS200              | 4.66E-05 | 0.03763528 |
| cg07982899 | C4orf22                 | NM_152770                           | Body                | 4.67E-05 | 0.03763528 |
| cg03045325 | MACROD1;FLRT1           | NM_014067;NM_013280                 | Body;TSS200         | 4.67E-05 | 0.03763528 |
| cg16814416 | TCTEX1D4                | NM_001013632                        | Body                | 4.68E-05 | 0.03763528 |
| cg01983759 | MED16                   | NM_005481                           | 3'UTR               | 4.69E-05 | 0.03763528 |
| cg07317983 | ZBTB20;ZBTB20           | NM_015642;NM_001164343              | 5'UTR;TSS1500       | 4.69E-05 | 0.03763528 |
| cg14862791 | TTC23L                  | NM_144725                           | 5'UTR               | 4.69E-05 | 0.03763528 |
| cg14842398 | KIAA0182                | NM_001134473                        | 5'UTR               | 4.76E-05 | 0.03774502 |
| cg09173621 | ARHGEF7;ARHGEF7;ARHGEF7 | NM_001113511;NM_001113512;NM_145735 | Body;Body;Body      | 4.77E-05 | 0.03774502 |
| cg21790971 | FIP1L1;FIP1L1;FIP1L1    | NM_030917;NM_001134938;NM_001134937 | Body;Body;Body      | 4.77E-05 | 0.03774502 |
| cg15026150 | ATP8B2                  | NM_001005855                        | TSS200              | 4.78E-05 | 0.03774502 |
| cg04903691 | CXCR5;CXCR5             | NM_001716;NM_032966                 | Body;TSS200         | 4.79E-05 | 0.03774502 |
| cg13789711 | PHPT1;PHPT1             | NM_001135861;NM_014172              | TSS200;TSS200       | 4.79E-05 | 0.03774502 |
| cg19455335 | C8orf58                 | NM_001013842                        | Body                | 4.79E-05 | 0.03774502 |
| cg08604596 | CCDC101                 | NM_138414                           | 5'UTR               | 4.79E-05 | 0.03774502 |
| cg08073153 | LEMD2;LEMD2             | NM_181336;NM_001143944              | Body;TSS200         | 4.83E-05 | 0.03797013 |
| cg01334186 | PSMB4                   | NM_002796                           | Body                | 4.85E-05 | 0.03797013 |
| cg20936321 | NA                      | NA                                  | NA                  | 4.87E-05 | 0.03799396 |
| cg02881186 | TRAPP9;TRAPP9           | NM_001160372;NM_031466              | Body;Body           | 4.87E-05 | 0.03799396 |
| cg08913530 | C10orf129               | NM_207321                           | Body                | 4.90E-05 | 0.03810436 |
| cg02716826 | SUGT1P1;AQP3            | NR_003667;NM_004925                 | Body;Body           | 4.94E-05 | 0.03830621 |
| cg06423822 | PTPRN2;PTPRN2;PTPRN2    | NM_002847;NM_130842;NM_130843       | Body;Body;Body      | 4.94E-05 | 0.03830621 |
| cg00522636 | DCP2                    | NM_152624                           | 1stExon             | 4.97E-05 | 0.0383309  |

|            |                      |                                     |                 |          |            |
|------------|----------------------|-------------------------------------|-----------------|----------|------------|
| cg04428700 | HOXA13               | NM_000522                           | 1stExon         | 4.98E-05 | 0.0383309  |
| cg15670865 | PLA2G6;PLA2G6        | NM_003560;NM_001004426              | Body;Body       | 4.98E-05 | 0.0383309  |
| cg13397282 | DAB2IP;DAB2IP        | NM_138709;NM_032552                 | Body;Body       | 5.05E-05 | 0.03872293 |
| cg04226364 | MYST2                | NM_007067                           | TSS200          | 5.05E-05 | 0.03872293 |
| cg19967421 | XCR1;XCR1            | NM_005283;NM_001024644              | Body;Body       | 5.07E-05 | 0.0387637  |
| cg01091261 | ADCY9                | NM_001116                           | Body            | 5.09E-05 | 0.03877804 |
| cg06199907 | MARVELD3             | NM_001017967                        | Body            | 5.11E-05 | 0.03877804 |
| cg21104686 | NA                   | NA                                  | NA              | 5.12E-05 | 0.03877804 |
| cg02951880 | VANGL2               | NM_020335                           | Body            | 5.12E-05 | 0.03877804 |
| cg02463166 | SPTBN1;SPTBN1        | NM_178313;NM_003128                 | Body;Body       | 5.15E-05 | 0.03879009 |
| cg12937438 | NA                   | NA                                  | NA              | 5.15E-05 | 0.03879009 |
| cg21099470 | ZNF518B              | NM_053042                           | TSS200          | 5.16E-05 | 0.03879009 |
| cg09872774 | NR2E3;NR2E3          | NM_014249;NM_016346                 | Body;Body       | 5.17E-05 | 0.03879009 |
| cg18633432 | MSL2                 | NM_018133                           | TSS1500         | 5.18E-05 | 0.03881808 |
| cg19737664 | LRRCS6               | NM_198075                           | TSS200          | 5.22E-05 | 0.03900233 |
| cg00160522 | FGFRL1;FGFRL1;FGFRL1 | NM_001004358;NM_001004356;NM_021923 | Body;Body;Body  | 5.24E-05 | 0.039058   |
| cg14650228 | ZC3H3                | NM_015117                           | Body            | 5.29E-05 | 0.03933022 |
| cg05567435 | METTL7B              | NM_152637                           | TSS1500         | 5.30E-05 | 0.03933022 |
| cg24059022 | SLC12A7              | NM_006598                           | Body            | 5.33E-05 | 0.03952712 |
| cg01243823 | NOD2                 | NM_022162                           | Body            | 5.36E-05 | 0.03960058 |
| cg00310201 | ZAP70;ZAP70          | NM_001079;NM_207519                 | Body;Body       | 5.38E-05 | 0.03960058 |
| cg14054990 | KRTAP19-5            | NM_181611                           | TSS200          | 5.38E-05 | 0.03960058 |
| cg19853194 | VAPA;VAPA            | NM_194434;NM_003574                 | TSS1500;TSS1500 | 5.39E-05 | 0.03960058 |
| cg20566449 | RASA3                | NM_007368                           | Body            | 5.40E-05 | 0.03960058 |
| cg24044651 | C1orf128             | NM_020362                           | Body            | 5.42E-05 | 0.0396528  |
| cg19385725 | NPC1                 | NM_000271                           | Body            | 5.43E-05 | 0.03966414 |

|            |                    |                                     |                   |          |            |
|------------|--------------------|-------------------------------------|-------------------|----------|------------|
| cg04362790 | NA                 | NA                                  | NA                | 5.45E-05 | 0.03972649 |
| cg15044954 | C7orf63;C7orf63    | NM_001039706;NM_001160138           | TSS200;TSS200     | 5.49E-05 | 0.03992478 |
| cg05978306 | MYO1C;MYO1C;MYO1C  | NM_001080779;NM_033375;NM_001080950 | Body;Body;Body    | 5.51E-05 | 0.03995238 |
| cg23402821 | NA                 | NA                                  | NA                | 5.54E-05 | 0.03995238 |
| cg16610810 | ITGA9              | NM_002207                           | Body              | 5.55E-05 | 0.03995238 |
| cg16522993 | NA                 | NA                                  | NA                | 5.56E-05 | 0.03995238 |
| cg20136959 | CDADC1             | NM_030911                           | TSS200            | 5.57E-05 | 0.03995238 |
| cg18906002 | KIAA1688           | NM_025251                           | Body              | 5.58E-05 | 0.03995238 |
| cg04661591 | NA                 | NA                                  | NA                | 5.58E-05 | 0.03995238 |
| cg09299307 | CCNH               | NM_001239                           | TSS200            | 5.59E-05 | 0.03995238 |
| cg09350880 | DPF3               | NM_012074                           | 3'UTR             | 5.61E-05 | 0.03997204 |
| cg05207943 | NA                 | NA                                  | NA                | 5.62E-05 | 0.03997204 |
| cg07936541 | ANKRD36B           | NM_025190                           | 1stExon           | 5.63E-05 | 0.03997204 |
| cg09650907 | FAM104A;FAM104A    | NM_032837;NM_001098832              | Body;Body         | 5.65E-05 | 0.03997204 |
| cg11973777 | NA                 | NA                                  | NA                | 5.66E-05 | 0.03997204 |
| cg21211680 | NA                 | NA                                  | NA                | 5.67E-05 | 0.03997204 |
| cg19500057 | STRN3;STRN3;MIR624 | NM_001083893;NM_014574;NR_030354    | Body;Body;TSS1500 | 5.68E-05 | 0.03997204 |
| cg15761814 | CCDC138            | NM_144978                           | Body              | 5.69E-05 | 0.03997204 |
| cg20418501 | NA                 | NA                                  | NA                | 5.74E-05 | 0.04010174 |
| cg06733311 | PHF1;PHF1;PHF1     | NR_027692;NM_002636;NM_024165       | Body;Body;Body    | 5.74E-05 | 0.04010174 |
| cg08862564 | CREB1;CREB1        | NM_134442;NM_004379                 | 5'UTR;5'UTR       | 5.76E-05 | 0.04010174 |
| cg03694795 | SC65               | NM_006455                           | Body              | 5.77E-05 | 0.04010174 |
| cg11235741 | MEX3B              | NM_032246                           | Body              | 5.81E-05 | 0.04010174 |
| cg18100830 | NA                 | NA                                  | NA                | 5.85E-05 | 0.04010174 |
| cg12243375 | GUCY1A2            | NM_000855                           | TSS200            | 5.85E-05 | 0.04010174 |
| cg07904028 | PPP2R2C;PPP2R2C    | NM_181876;NM_020416                 | Body;Body         | 5.86E-05 | 0.04010174 |

|            |                         |                                         |                     |          |            |
|------------|-------------------------|-----------------------------------------|---------------------|----------|------------|
| cg19225280 | TAF11                   | NM_005643                               | 3'UTR               | 5.86E-05 | 0.04010174 |
| cg20032723 | DCPS                    | NM_014026                               | 1stExon             | 5.86E-05 | 0.04010174 |
| cg02263813 | MT1A;MT1A               | NM_005946;NM_005946                     | 1stExon;5'UTR       | 5.88E-05 | 0.04010174 |
| cg08251160 | MGC72080                | NR_002822                               | Body                | 5.88E-05 | 0.04010174 |
| cg22346032 | NA                      | NA                                      | NA                  | 5.91E-05 | 0.04010174 |
| cg03678860 | TBCD                    | NM_005993                               | Body                | 5.91E-05 | 0.04010174 |
| cg24624173 | SLC22A11                | NM_018484                               | Body                | 5.92E-05 | 0.04010174 |
| cg12653788 | NA                      | NA                                      | NA                  | 5.92E-05 | 0.04010174 |
| cg09869950 | FGGY;FGGY               | NM_018291;NM_001113411                  | 5'UTR;5'UTR         | 5.93E-05 | 0.04010174 |
| cg04767756 | EMP2                    | NM_001424                               | 5'UTR               | 5.94E-05 | 0.04010174 |
| cg05639679 | KIAA1522                | NM_020888                               | Body                | 5.94E-05 | 0.04010174 |
| cg18420708 | EPHX3;EPHX3             | NM_024794;NM_001142886                  | Body;Body           | 5.95E-05 | 0.04010174 |
| cg18350497 | C11orf54                | NM_014039                               | 5'UTR               | 5.97E-05 | 0.04010174 |
| cg03708092 | NA                      | NA                                      | NA                  | 5.98E-05 | 0.04010174 |
| cg11342452 | NKX6-2                  | NM_177400                               | TSS1500             | 5.99E-05 | 0.04010174 |
| cg23095383 | PTPRC;PTPRC;PTPRC;PTPRC | NM_080922;NM_002838;NM_080923;NM_080921 | Body;Body;Body;Body | 5.99E-05 | 0.04010174 |
| cg21774377 | UHRF1BP1                | NM_017754                               | 1stExon             | 6.00E-05 | 0.04010174 |
| cg20011604 | TUBA3C                  | NM_006001                               | Body                | 6.03E-05 | 0.04017582 |
| cg18365406 | LPPR2;LPPR2             | NM_022737;NM_001170635                  | Body;Body           | 6.04E-05 | 0.04017582 |
| cg17204834 | ZNF589                  | NM_016089                               | TSS200              | 6.05E-05 | 0.04017582 |
| cg06963308 | NA                      | NA                                      | NA                  | 6.08E-05 | 0.04024596 |
| cg14420670 | NA                      | NA                                      | NA                  | 6.09E-05 | 0.04024596 |
| cg03157738 | KANK2                   | NM_001136191                            | 5'UTR               | 6.09E-05 | 0.04024596 |
| cg07823492 | HOXB1                   | NM_002144                               | 1stExon             | 6.10E-05 | 0.04024596 |
| cg16890600 | NA                      | NA                                      | NA                  | 6.18E-05 | 0.04061619 |
| cg07758528 | PARP8                   | NM_024615                               | Body                | 6.18E-05 | 0.04061619 |

|            |                                  |                                                         |                             |          |            |
|------------|----------------------------------|---------------------------------------------------------|-----------------------------|----------|------------|
| cg14138312 | KDM4C;KDM4C;KDM4C;KDM4C          | NM_015061;NM_001146694;NM_001146695;NM_001146696        | Body;Body;Body;Body         | 6.27E-05 | 0.0410154  |
| cg06873218 | PDGFB;PDGFB                      | NM_002608;NM_033016                                     | Body;TSS1500                | 6.28E-05 | 0.0410154  |
| cg24536827 | NA                               | NA                                                      | NA                          | 6.28E-05 | 0.0410154  |
| cg18391611 | SBK2                             | NM_001101401                                            | Body                        | 6.30E-05 | 0.04107536 |
| cg01973725 | RNU5E;RNU5D;ZCCHC9;ZCCHC9;ZCCHC9 | NR_002754;NR_002755;NM_032280;NM_001131036;NM_001131035 | Body;Body;3'UTR;3'UTR;3'UTR | 6.32E-05 | 0.04107536 |
| cg24250234 | NA                               | NA                                                      | NA                          | 6.33E-05 | 0.04107536 |
| cg12593303 | SPTBN1;SPTBN1                    | NM_178313;NM_003128                                     | TSS200;Body                 | 6.38E-05 | 0.04137592 |
| cg12738349 | MIF                              | NM_002415                                               | TSS1500                     | 6.42E-05 | 0.04151142 |
| cg10790887 | INPP5A                           | NM_005539                                               | Body                        | 6.43E-05 | 0.04152049 |
| cg04661747 | NA                               | NA                                                      | NA                          | 6.47E-05 | 0.04157528 |
| cg20248822 | C1orf151                         | NM_001032363                                            | TSS1500                     | 6.48E-05 | 0.04157528 |
| cg18511558 | ARHGEF10                         | NM_014629                                               | Body                        | 6.49E-05 | 0.04157528 |
| cg01093065 | PLEKHA4;PLEKHA4                  | NM_001161354;NM_020904                                  | TSS1500;TSS1500             | 6.53E-05 | 0.04157528 |
| cg12340219 | GPR123                           | NM_001083909                                            | Body                        | 6.54E-05 | 0.04157528 |
| cg03195665 | FPR2;FPR2                        | NM_001005738;NM_001462                                  | 5'UTR;TSS1500               | 6.55E-05 | 0.04157528 |
| cg24552424 | SLCO5A1;SLCO5A1;SLCO5A1          | NM_001146008;NM_030958;NM_001146009                     | 3'UTR;Body;Body             | 6.55E-05 | 0.04157528 |
| cg23319790 | MIR519D;MIR517A                  | NR_030202;NR_030201                                     | TSS1500;TSS200              | 6.57E-05 | 0.04157528 |
| cg06954660 | HLA-DOA                          | NM_002119                                               | Body                        | 6.59E-05 | 0.04157528 |
| cg20451986 | NA                               | NA                                                      | NA                          | 6.59E-05 | 0.04157528 |
| cg08964024 | NA                               | NA                                                      | NA                          | 6.59E-05 | 0.04157528 |
| cg09564133 | MXD3;MXD3;MXD3;MXD3              | NM_031300;NM_001142935;NM_031300;NM_001142935           | 1stExon;1stExon;5'UTR;5'UTR | 6.61E-05 | 0.04157528 |
| cg17362483 | NA                               | NA                                                      | NA                          | 6.62E-05 | 0.04157528 |
| cg13944397 | NA                               | NA                                                      | NA                          | 6.63E-05 | 0.04157528 |
| cg14750501 | CCNE1;CCNE1;CCNE1                | NM_057182;NM_001238;NM_001238                           | TSS1500;5'UTR;1stExon       | 6.64E-05 | 0.04157528 |
| cg18911817 | NKD2                             | NM_033120                                               | Body                        | 6.65E-05 | 0.04157528 |
| cg16300033 | ANKRD30A                         | NM_052997                                               | TSS1500                     | 6.69E-05 | 0.04157528 |

|            |                                                 |                                                                         |                                           |          |            |
|------------|-------------------------------------------------|-------------------------------------------------------------------------|-------------------------------------------|----------|------------|
| cg17588812 | KIF1A                                           | NM_004321                                                               | Body                                      | 6.69E-05 | 0.04157528 |
| cg22628240 | NA                                              | NA                                                                      | NA                                        | 6.70E-05 | 0.04157528 |
| cg01721822 | TMEM88B                                         | NM_001146685                                                            | TSS1500                                   | 6.73E-05 | 0.04157528 |
| cg14964327 | NA                                              | NA                                                                      | NA                                        | 6.73E-05 | 0.04157528 |
| cg11791144 | NRG1                                            | NM_013962                                                               | Body                                      | 6.74E-05 | 0.04157528 |
| cg19701416 | NA                                              | NA                                                                      | NA                                        | 6.74E-05 | 0.04157528 |
| cg05397362 | NA                                              | NA                                                                      | NA                                        | 6.74E-05 | 0.04157528 |
| cg21151017 | NA                                              | NA                                                                      | NA                                        | 6.74E-05 | 0.04157528 |
| cg23413289 | FAT1                                            | NM_005245                                                               | Body                                      | 6.77E-05 | 0.04159311 |
| cg05233324 | NA                                              | NA                                                                      | NA                                        | 6.77E-05 | 0.04159311 |
| cg21367769 | SCGN                                            | NM_006998                                                               | TSS1500                                   | 6.78E-05 | 0.04159311 |
| cg00008819 | C4orf44;C4orf44                                 | NM_001042690;NM_001012982                                               | 3'UTR;Body                                | 6.80E-05 | 0.04161751 |
| cg14476101 | PHGDH                                           | NM_006623                                                               | Body                                      | 6.81E-05 | 0.04161751 |
| cg04948956 | NA                                              | NA                                                                      | NA                                        | 6.88E-05 | 0.04198003 |
| cg23226387 | TACO1                                           | NM_016360                                                               | TSS1500                                   | 6.90E-05 | 0.04200428 |
| cg01374398 | SCAP                                            | NM_012235                                                               | 5'UTR                                     | 6.93E-05 | 0.04211344 |
| cg16956456 | C5orf41;C5orf41;C5orf41;C5orf41;C5orf41;C5orf41 | NM_001168394;NM_153607;NM_001168394;NM_001168393;NM_001168393;NM_153607 | 1stExon;1stExon;5'UTR;1stExon;5'UTR;5'UTR | 6.95E-05 | 0.04218603 |
| cg21120176 | LOC285780                                       | NR_026970                                                               | Body                                      | 6.99E-05 | 0.04231198 |
| cg08695707 | C1orf53                                         | NM_001024594                                                            | 1stExon                                   | 7.00E-05 | 0.04231198 |
| cg02078896 | MACROD2;MACROD2                                 | NM_080676;NM_001033087                                                  | Body;TSS1500                              | 7.05E-05 | 0.04253703 |
| cg15537788 | SIPA1L3                                         | NM_015073                                                               | 3'UTR                                     | 7.06E-05 | 0.04254987 |
| cg22957121 | MGAT4C                                          | NM_013244                                                               | 5'UTR                                     | 7.12E-05 | 0.04283115 |
| cg19116956 | NA                                              | NA                                                                      | NA                                        | 7.14E-05 | 0.04284437 |
| cg04423542 | TRIM39;HCG18;HCG18;TRIM39                       | NM_021253;NR_024052;NR_024053;NM_172016                                 | TSS1500;Body;Body;TSS1500                 | 7.17E-05 | 0.04298482 |
| cg15965155 | NA                                              | NA                                                                      | NA                                        | 7.21E-05 | 0.04310131 |
| cg13088902 | NA                                              | NA                                                                      | NA                                        | 7.24E-05 | 0.04320446 |

|            |                                         |                                                   |                              |          |            |
|------------|-----------------------------------------|---------------------------------------------------|------------------------------|----------|------------|
| cg02765496 | FAM122A;PIP5K1B                         | NM_138333;NM_003558                               | TSS1500;5'UTR                | 7.30E-05 | 0.04337925 |
| cg05947499 | TPCN1;TPCN1                             | NM_001143819;NM_017901                            | Body;Body                    | 7.30E-05 | 0.04337925 |
| cg24420395 | DUSP4;DUSP4                             | NM_001394;NM_057158                               | Body;TSS1500                 | 7.31E-05 | 0.04337925 |
| cg14007221 | FRMPD1                                  | NM_014907                                         | 5'UTR                        | 7.32E-05 | 0.04337925 |
| cg25233569 | RHOBTB1;RHOBTB1;RHOBTB1;RHOBTB1;RHOBTB1 | NR_024555;NM_014836;NM_014836;NR_024554;NR_024556 | Body;1stExon;5'UTR;Body;Body | 7.38E-05 | 0.04363211 |
| cg06677352 | PMS2L2;STAG3L3;STAG3L3                  | NR_003614;NM_001013739;NM_001013739               | TSS1500;5'UTR;1stExon        | 7.40E-05 | 0.04363211 |
| cg09391949 | JPH3                                    | NM_020655                                         | 3'UTR                        | 7.44E-05 | 0.04367326 |
| cg13554030 | LSM2                                    | NM_021177                                         | Body                         | 7.46E-05 | 0.04367326 |
| cg17780691 | MYH3                                    | NM_002470                                         | Body                         | 7.46E-05 | 0.04367326 |
| cg09198463 | ATL2;ATL2;ATL2                          | NM_022374;NM_001135673;NR_024191                  | Body;Body;Body               | 7.47E-05 | 0.04367326 |
| cg21583412 | NUFIP2                                  | NM_020772                                         | TSS1500                      | 7.49E-05 | 0.04367326 |
| cg01489057 | DMBT1;DMBT1;DMBT1                       | NM_007329;NM_004406;NM_017579                     | Body;Body;Body               | 7.50E-05 | 0.04367326 |
| cg24162465 | NA                                      | NA                                                | NA                           | 7.51E-05 | 0.04367326 |
| cg11333007 | TMOD3;TMOD3                             | NM_014547;NM_014547                               | 5'UTR;1stExon                | 7.51E-05 | 0.04367326 |
| cg08814206 | PPT2;PPT2                               | NM_005155;NM_138717                               | Body;Body                    | 7.53E-05 | 0.04368054 |
| cg12884982 | JPH1                                    | NM_020647                                         | Body                         | 7.53E-05 | 0.04368054 |
| cg06307212 | EGFL8                                   | NM_030652                                         | Body                         | 7.55E-05 | 0.04370427 |
| cg00894870 | MRT04;KIAA0090                          | NM_016183;NM_015047                               | Body;TSS1500                 | 7.58E-05 | 0.04377161 |
| cg21654058 | CCDC137                                 | NM_199287                                         | 3'UTR                        | 7.61E-05 | 0.04377253 |
| cg05864433 | AMZ1                                    | NM_133463                                         | 5'UTR                        | 7.61E-05 | 0.04377253 |
| cg21273856 | NCOA7;NCOA7;NCOA7;NCOA7                 | NM_181782;NM_001122842;NM_181782;NM_001122842     | 5'UTR;5'UTR;1stExon;1stExon  | 7.61E-05 | 0.04377253 |
| cg13896328 | PTPRU;PTPRU;PTPRU                       | NM_005704;NM_133178;NM_133177                     | 3'UTR;3'UTR;3'UTR            | 7.65E-05 | 0.04383002 |
| cg10187692 | VPS13B;VPS13B                           | NM_017890;NM_152564                               | Body;Body                    | 7.66E-05 | 0.04383002 |
| cg08788291 | RECQL5;LOC643008                        | NM_004259;NM_001162995                            | Body;TSS1500                 | 7.66E-05 | 0.04383002 |
| cg20303815 | NA                                      | NA                                                | NA                           | 7.70E-05 | 0.04396392 |
| cg02866076 | NA                                      | NA                                                | NA                           | 7.73E-05 | 0.04399808 |



|            |                          |                                               |                           |          |            |
|------------|--------------------------|-----------------------------------------------|---------------------------|----------|------------|
| cg03900195 | CHAF1B                   | NM_005441                                     | 5'UTR                     | 7.74E-05 | 0.04399808 |
| cg14253896 | NA                       | NA                                            | NA                        | 7.75E-05 | 0.04399808 |
| cg25244200 | NA                       | NA                                            | NA                        | 7.76E-05 | 0.04399808 |
| cg23978242 | DIP2C                    | NM_014974                                     | Body                      | 7.78E-05 | 0.04401179 |
| cg13135459 | LOC387646                | NR_003525                                     | TSS200                    | 7.79E-05 | 0.04401179 |
| cg00588689 | NA                       | NA                                            | NA                        | 7.80E-05 | 0.04401179 |
| cg17767933 | NA                       | NA                                            | NA                        | 7.82E-05 | 0.04401179 |
| cg02393907 | ACTR3C                   | NM_001164458                                  | 5'UTR                     | 7.82E-05 | 0.04401179 |
| cg08722720 | AVEN;CHRM5               | NM_020371;NM_012125                           | TSS1500;5'UTR             | 7.85E-05 | 0.04403307 |
| cg07016356 | CXCR1                    | NM_000634                                     | TSS1500                   | 7.86E-05 | 0.04403307 |
| cg16053745 | C3orf43                  | NM_001077657                                  | Body                      | 7.87E-05 | 0.04403307 |
| cg13462275 | TCP10                    | NM_004610                                     | TSS1500                   | 7.88E-05 | 0.04403307 |
| cg09920427 | MORG1;MORG1;MAN2B1;MORG1 | NM_001099737;NM_001099737;NM_000528;NR_029375 | 1stExon;5'UTR;TSS200;Body | 7.91E-05 | 0.04403307 |
| cg02956660 | HSPG2                    | NM_005529                                     | Body                      | 7.93E-05 | 0.04403307 |
| cg16209873 | OR52W1                   | NM_001005178                                  | TSS1500                   | 7.93E-05 | 0.04403307 |
| cg08015507 | NCKIPSD;NCKIPSD          | NM_016453;NM_184231                           | Body;Body                 | 7.93E-05 | 0.04403307 |
| cg00007800 | NA                       | NA                                            | NA                        | 7.94E-05 | 0.04403307 |
| cg25214900 | SYT1;SYT1;SYT1           | NM_005639;NM_001135805;NM_001135806           | Body;Body;Body            | 7.99E-05 | 0.04422224 |
| cg05063097 | ZNF423                   | NM_015069                                     | TSS1500                   | 8.01E-05 | 0.04422224 |
| cg18181703 | SOCS3                    | NM_003955                                     | Body                      | 8.02E-05 | 0.04422224 |
| cg06293170 | NA                       | NA                                            | NA                        | 8.04E-05 | 0.04424017 |
| cg02891801 | SCNN1A;SCNN1A;SCNN1A     | NM_001159575;NM_001038;NM_001159576           | Body;Body;Body            | 8.05E-05 | 0.04424017 |
| cg17126142 | NA                       | NA                                            | NA                        | 8.06E-05 | 0.04424017 |
| cg02581828 | NA                       | NA                                            | NA                        | 8.08E-05 | 0.04424017 |
| cg08577693 | NUTF2                    | NM_005796                                     | Body                      | 8.08E-05 | 0.04424017 |
| cg13659329 | NA                       | NA                                            | NA                        | 8.10E-05 | 0.04427962 |

|            |                                                 |                                                             |                                           |          |            |
|------------|-------------------------------------------------|-------------------------------------------------------------|-------------------------------------------|----------|------------|
| cg18219432 | PTPRN2;PTPRN2;PTPRN2                            | NM_002847;NM_130842;NM_130843                               | Body;Body;Body                            | 8.16E-05 | 0.04443359 |
| cg09174741 | THSD1;THSD1                                     | NM_199263;NM_018676                                         | TSS1500;TSS1500                           | 8.17E-05 | 0.04443359 |
| cg02412123 | SIGLEC9;SIGLEC9                                 | NM_014441;NM_014441                                         | 5'UTR;1stExon                             | 8.17E-05 | 0.04443359 |
| cg04678715 | FANK1                                           | NM_145235                                                   | Body                                      | 8.19E-05 | 0.04443359 |
| cg02894226 | ITPA;ITPA                                       | NM_181493;NM_033453                                         | Body;Body                                 | 8.23E-05 | 0.04461203 |
| cg20168964 | TMEM132D                                        | NM_133448                                                   | Body                                      | 8.25E-05 | 0.04464195 |
| cg13875763 | NA                                              | NA                                                          | NA                                        | 8.29E-05 | 0.04479279 |
| cg09764443 | POU2F3                                          | NM_014352                                                   | TSS1500                                   | 8.35E-05 | 0.04499695 |
| cg07022307 | ATP1A4;ATP1A4                                   | NM_001001734;NM_144699                                      | TSS1500;Body                              | 8.36E-05 | 0.04499695 |
| cg06788172 | DMXL2                                           | NM_015263                                                   | TSS200                                    | 8.39E-05 | 0.04508467 |
| cg18181431 | NA                                              | NA                                                          | NA                                        | 8.40E-05 | 0.04508467 |
| cg21457856 | NA                                              | NA                                                          | NA                                        | 8.42E-05 | 0.04514076 |
| cg05086567 | MPDU1;MPDU1                                     | NM_004870;NR_024603                                         | TSS1500;TSS1500                           | 8.45E-05 | 0.04515042 |
| cg11668638 | PPP2R5D;PPP2R5D;PPP2R5D;PPP2R5D;PPP2R5D;PPP2R5D | NM_180977;NM_180976;NM_180976;NM_006245;NM_006245;NM_180977 | 5'UTR;5'UTR;1stExon;5'UTR;1stExon;1stExon | 8.45E-05 | 0.04515042 |
| cg06330593 | KRT34                                           | NM_021013                                                   | Body                                      | 8.49E-05 | 0.04530231 |
| cg13426340 | NA                                              | NA                                                          | NA                                        | 8.51E-05 | 0.04532096 |
| cg09864156 | SUPV3L1                                         | NM_003171                                                   | TSS1500                                   | 8.53E-05 | 0.04533359 |
| cg05761882 | CAPN2;CAPN2                                     | NM_001748;NM_001146068                                      | Body;Body                                 | 8.54E-05 | 0.04533359 |
| cg06115835 | SH3RF3                                          | NM_001099289                                                | Body                                      | 8.58E-05 | 0.04549325 |
| cg05063087 | C10orf75                                        | NR_026762                                                   | TSS200                                    | 8.59E-05 | 0.04549325 |
| cg17951368 | NUCB2                                           | NM_005013                                                   | TSS200                                    | 8.63E-05 | 0.04561776 |
| cg03640568 | DDX17;DDX17                                     | NM_006386;NM_001098504                                      | TSS1500;TSS1500                           | 8.65E-05 | 0.04561776 |
| cg02021544 | MYLK3                                           | NM_182493                                                   | TSS1500                                   | 8.67E-05 | 0.04561776 |
| cg05626927 | NA                                              | NA                                                          | NA                                        | 8.70E-05 | 0.04561776 |
| cg04993564 | NSMAF;NSMAF                                     | NM_003580;NM_001144772                                      | Body;TSS200                               | 8.70E-05 | 0.04561776 |
| cg04026699 | NA                                              | NA                                                          | NA                                        | 8.71E-05 | 0.04561776 |

|            |                                                             |                                                                                               |                                                                       |          |            |
|------------|-------------------------------------------------------------|-----------------------------------------------------------------------------------------------|-----------------------------------------------------------------------|----------|------------|
| cg11869499 | POLG;POLG                                                   | NM_001126131;NM_002693                                                                        | Body;Body                                                             | 8.73E-05 | 0.04561776 |
| cg07189582 | SEC24B;SEC24B                                               | NM_006323;NM_001042734                                                                        | Body;Body                                                             | 8.74E-05 | 0.04561776 |
| cg05353415 | GLI3                                                        | NM_000168                                                                                     | 5'UTR                                                                 | 8.74E-05 | 0.04561776 |
| cg21546837 | NA                                                          | NA                                                                                            | NA                                                                    | 8.76E-05 | 0.04561776 |
| cg19504496 | RBM42                                                       | NM_024321                                                                                     | TSS200                                                                | 8.76E-05 | 0.04561776 |
| cg06273763 | MYO1E;MYO1E                                                 | NM_004998;NM_004998                                                                           | 5'UTR;1stExon                                                         | 8.83E-05 | 0.04588118 |
| cg19418922 | EXT2;EXT2                                                   | NM_000401;NM_207122                                                                           | 3'UTR;3'UTR                                                           | 8.85E-05 | 0.04588118 |
| cg02655824 | RPS6KA2                                                     | NM_001006932                                                                                  | Body                                                                  | 8.87E-05 | 0.04588118 |
| cg06134974 | CSRNP2                                                      | NM_030809                                                                                     | TSS1500                                                               | 8.87E-05 | 0.04588118 |
| cg23624929 | NA                                                          | NA                                                                                            | NA                                                                    | 8.91E-05 | 0.04600861 |
| cg14249922 | GADD45G                                                     | NM_006705                                                                                     | 3'UTR                                                                 | 8.96E-05 | 0.04609631 |
| cg16815882 | KIAA0319L                                                   | NM_024874                                                                                     | Body                                                                  | 8.97E-05 | 0.04609631 |
| cg08846459 | NA                                                          | NA                                                                                            | NA                                                                    | 8.98E-05 | 0.04609631 |
| cg12853981 | TOMM20L                                                     | NM_207377                                                                                     | 1stExon                                                               | 8.98E-05 | 0.04609631 |
| cg13086025 | KIAA1967;KIAA1967                                           | NM_021174;NM_199205                                                                           | Body;Body                                                             | 9.01E-05 | 0.0461738  |
| cg24677472 | NA                                                          | NA                                                                                            | NA                                                                    | 9.02E-05 | 0.0461738  |
| cg00658449 | BEYLA;BEYLA                                                 | NR_027012;NR_027013                                                                           | TSS1500;TSS1500                                                       | 9.07E-05 | 0.04630641 |
| cg20111269 | BTBD11                                                      | NM_001018072                                                                                  | Body                                                                  | 9.08E-05 | 0.04630641 |
| cg06548214 | NPEPL1                                                      | NM_024663                                                                                     | Body                                                                  | 9.09E-05 | 0.04630641 |
| cg03890538 | RPTOR;RPTOR                                                 | NM_020761;NM_001163034                                                                        | 3'UTR;3'UTR                                                           | 9.13E-05 | 0.04640457 |
| cg19526076 | NA                                                          | NA                                                                                            | NA                                                                    | 9.13E-05 | 0.04640457 |
| cg05072951 | CAPN1;CAPN1                                                 | NM_005186;NM_005186                                                                           | 1stExon;5'UTR                                                         | 9.17E-05 | 0.04646561 |
| cg06611444 | NA                                                          | NA                                                                                            | NA                                                                    | 9.17E-05 | 0.04646561 |
| cg10981770 | C1orf122;YRDC;C1orf122                                      | NM_198446;NM_024640;NM_001142726                                                              | TSS1500;Body;TSS1500                                                  | 9.20E-05 | 0.04652489 |
| cg10996143 | FKBP1A;FKBP1A                                               | NM_000801;NM_054014                                                                           | TSS200;TSS200                                                         | 9.25E-05 | 0.04669819 |
| cg03648631 | UBE2D3;UBE2D3;UBE2D3;UBE2D3;<br>UBE2D3;UBE2D3;UBE2D3;UBE2D3 | NM_181887;NM_181891;NM_181889;NM_181888;<br>NM_181892;NM_181893;NM_003340;NM_181890;NM_181886 | TSS1500;TSS1500;TSS200;TSS1500;TSS1500;B<br>ody;TSS1500;5'UTR;TSS1500 | 9.27E-05 | 0.04669819 |

|            |                      |                                     |                       |          |            |
|------------|----------------------|-------------------------------------|-----------------------|----------|------------|
| cg14542646 | NA                   | NA                                  | NA                    | 9.30E-05 | 0.04669819 |
| cg07766948 | CUEDC2               | NM_024040                           | 5'UTR                 | 9.32E-05 | 0.04669819 |
| cg01258793 | MAD1L1;MAD1L1;MAD1L1 | NM_003550;NM_001013837;NM_001013836 | Body;Body;Body        | 9.32E-05 | 0.04669819 |
| cg17562763 | NUDT8                | NM_181843                           | TSS1500               | 9.33E-05 | 0.04669819 |
| cg06332304 | CTBP2;CTBP2          | NM_001083914;NM_001329              | 5'UTR;5'UTR           | 9.33E-05 | 0.04669819 |
| cg08540945 | NA                   | NA                                  | NA                    | 9.35E-05 | 0.04669819 |
| cg05304037 | PRR12;PRRG2          | NM_020719;NM_000951                 | TSS1500;3'UTR         | 9.36E-05 | 0.04669819 |
| cg10089324 | EPS15                | NM_001981                           | Body                  | 9.47E-05 | 0.04721343 |
| cg13695383 | AGFG2                | NM_006076                           | Body                  | 9.50E-05 | 0.04727339 |
| cg19775406 | MIS12;MIS12;DERL2    | NM_024039;NM_024039;NM_016041       | 5'UTR;1stExon;TSS1500 | 9.55E-05 | 0.04743654 |
| cg25188165 | NA                   | NA                                  | NA                    | 9.57E-05 | 0.04750452 |
| cg21950037 | NA                   | NA                                  | NA                    | 9.62E-05 | 0.04763259 |
| cg03443922 | CBLL1;CBLL1          | NM_024814;NR_024199                 | Body;Body             | 9.65E-05 | 0.04763259 |
| cg10577346 | RPL27A;RPL27A        | NM_000990;NM_000990                 | 5'UTR;1stExon         | 9.66E-05 | 0.04763259 |
| cg05608508 | NTAN1                | NM_173474                           | Body                  | 9.68E-05 | 0.04763259 |
| cg03797768 | NA                   | NA                                  | NA                    | 9.70E-05 | 0.04763259 |
| cg01789926 | C16orf91             | NM_001010878                        | Body                  | 9.72E-05 | 0.04763259 |
| cg21515243 | RIOK3;RIOK3          | NM_003831;NM_003831                 | 1stExon;5'UTR         | 9.72E-05 | 0.04763259 |
| cg05571558 | ATP2B2;MIR885;ATP2B2 | NM_001683;NR_030614;NM_001001331    | Body;TSS200;Body      | 9.72E-05 | 0.04763259 |
| cg15128334 | TMEM41A              | NM_080652                           | Body                  | 9.74E-05 | 0.04763259 |
| cg16098340 | MIR548C;RASSF3       | NR_030347;NM_178169                 | TSS1500;Body          | 9.74E-05 | 0.04763259 |
| cg18342900 | C16orf87             | NM_001001436                        | 1stExon               | 9.75E-05 | 0.04763259 |
| cg16692534 | FOXK2                | NM_004514                           | Body                  | 9.77E-05 | 0.04763326 |
| cg12456777 | SNORD42B;RPL23A      | NR_000013;NM_000984                 | TSS1500;1stExon       | 9.78E-05 | 0.04763326 |
| cg09468777 | PDE6B;PDE6B;PDE6B    | NM_000283;NM_001145291;NM_001145292 | Body;Body;Body        | 9.82E-05 | 0.04769851 |
| cg18762795 | NA                   | NA                                  | NA                    | 9.86E-05 | 0.04769851 |

|            |                 |                                         |                     |            |            |
|------------|-----------------|-----------------------------------------|---------------------|------------|------------|
| cg13057368 | SSB;SSB         | NM_003142;NM_003142                     | 5'UTR;1stExon       | 9.86E-05   | 0.04769851 |
| cg07433154 | NA              | NA                                      | NA                  | 9.87E-05   | 0.04769851 |
| cg07980405 | ZBTB12          | NM_181842                               | TSS1500             | 9.89E-05   | 0.04769851 |
| cg12610079 | C1orf110        | NM_178550                               | TSS1500             | 9.94E-05   | 0.04769851 |
| cg07960624 | SAMD12          | NM_001101676                            | 3'UTR               | 9.94E-05   | 0.04769851 |
| cg24969222 | NA              | NA                                      | NA                  | 9.94E-05   | 0.04769851 |
| cg04317962 | NA              | NA                                      | NA                  | 9.94E-05   | 0.04769851 |
| cg00474854 | GNAL;GNAL;GNAL  | NM_001142339;NM_182978;NM_002071        | Body;Body;Body      | 9.97E-05   | 0.04769851 |
| cg09234616 | WT1;WT1;WT1;WT1 | NM_024425;NM_024426;NM_000378;NM_024424 | Body;Body;Body;Body | 9.97E-05   | 0.04769851 |
| cg24263283 | MYO1E           | NM_004998                               | Body                | 9.98E-05   | 0.04769851 |
| cg11332951 | NA              | NA                                      | NA                  | 9.98E-05   | 0.04769851 |
| cg14563732 | TSNARE1         | NM_145003                               | 5'UTR               | 9.99E-05   | 0.04769851 |
| cg11547486 | NET1            | NM_001047160                            | TSS200              | 0.00010039 | 0.04786349 |
| cg01335566 | CHD5            | NM_015557                               | Body                | 0.00010064 | 0.04791824 |
| cg15358743 | SEC11C          | NM_033280                               | TSS200              | 0.00010088 | 0.04796471 |
| cg17586419 | TOP1P2;PIWIL3   | NR_001283;NM_001008496                  | TSS1500;5'UTR       | 0.00010118 | 0.04798878 |
| cg02194046 | NA              | NA                                      | NA                  | 0.00010135 | 0.04798878 |
| cg20217938 | NA              | NA                                      | NA                  | 0.00010164 | 0.04798878 |
| cg22730398 | NA              | NA                                      | NA                  | 0.00010175 | 0.04798878 |
| cg10082357 | ATP6V1F         | NM_004231                               | 3'UTR               | 0.00010202 | 0.04798878 |
| cg15305352 | NA              | NA                                      | NA                  | 0.00010212 | 0.04798878 |
| cg10126022 | NA              | NA                                      | NA                  | 0.00010254 | 0.04798878 |
| cg23330006 | NUAK1           | NM_014840                               | Body                | 0.00010282 | 0.04798878 |
| cg17740822 | DUSP6;DUSP6     | NM_001946;NM_022652                     | Body;Body           | 0.00010282 | 0.04798878 |
| cg01264963 | OR10G4          | NM_001004462                            | TSS1500             | 0.00010284 | 0.04798878 |
| cg01261044 | SRP54;SRP54     | NM_003136;NM_001146282                  | TSS200;TSS200       | 0.0001029  | 0.04798878 |

|            |                                                             |                                                                                           |                                                             |            |            |
|------------|-------------------------------------------------------------|-------------------------------------------------------------------------------------------|-------------------------------------------------------------|------------|------------|
| cg18651192 | NA                                                          | NA                                                                                        | NA                                                          | 0.00010316 | 0.04798878 |
| cg17367356 | MAPK8IP1                                                    | NM_005456                                                                                 | TSS200                                                      | 0.00010318 | 0.04798878 |
| cg06900676 | KIAA1841;KIAA1841                                           | NM_001129993;NM_032506                                                                    | 5'UTR;TSS200                                                | 0.00010353 | 0.04798878 |
| cg09887867 | NA                                                          | NA                                                                                        | NA                                                          | 0.0001037  | 0.04798878 |
| cg06883956 | MEGF6;MIR551A                                               | NM_001409;NR_030277                                                                       | Body;Body                                                   | 0.00010379 | 0.04798878 |
| cg11875044 | NA                                                          | NA                                                                                        | NA                                                          | 0.00010384 | 0.04798878 |
| cg00143700 | RCBTB2                                                      | NM_001268                                                                                 | 5'UTR                                                       | 0.00010394 | 0.04798878 |
| cg12096988 | ZNF264                                                      | NM_003417                                                                                 | TSS200                                                      | 0.00010416 | 0.04798878 |
| cg15929201 | RNASEN;C5orf22;RNASEN                                       | NM_013235;NM_018356;NM_001100412                                                          | 5'UTR;TSS1500;5'UTR                                         | 0.00010426 | 0.04798878 |
| cg08571347 | NA                                                          | NA                                                                                        | NA                                                          | 0.00010427 | 0.04798878 |
| cg15312298 | FAM84B                                                      | NM_174911                                                                                 | TSS1500                                                     | 0.00010434 | 0.04798878 |
| cg12639422 | UGP2;UGP2;UGP2                                              | NM_006759;NM_006759;NM_001001521                                                          | 1stExon;5'UTR;5'UTR                                         | 0.00010439 | 0.04798878 |
| cg11615347 | ENPP7                                                       | NM_178543                                                                                 | Body                                                        | 0.00010445 | 0.04798878 |
| cg01903185 | FGFR3;FGFR3;FGFR3                                           | NM_001163213;NM_000142;NM_022965                                                          | Body;Body;Body                                              | 0.00010475 | 0.04798878 |
| cg03820205 | VDAC2                                                       | NM_003375                                                                                 | TSS200                                                      | 0.00010506 | 0.04798878 |
| cg11690896 | BIRC2                                                       | NM_001166                                                                                 | TSS200                                                      | 0.00010517 | 0.04798878 |
| cg16542646 | NA                                                          | NA                                                                                        | NA                                                          | 0.00010532 | 0.04798878 |
| cg12455797 | TCERG1L                                                     | NM_174937                                                                                 | Body                                                        | 0.00010536 | 0.04798878 |
| cg13463033 | SEC16A                                                      | NM_014866                                                                                 | Body                                                        | 0.00010544 | 0.04798878 |
| cg01764559 | NA                                                          | NA                                                                                        | NA                                                          | 0.00010586 | 0.04810262 |
| cg22129122 | NA                                                          | NA                                                                                        | NA                                                          | 0.00010597 | 0.04810262 |
| cg19741408 | ZNF326;LOC492303;ZNF326                                     | NM_182975;NR_002830;NM_182976                                                             | TSS1500;Body;TSS1500                                        | 0.00010613 | 0.04811256 |
| cg05053688 | S1PR1                                                       | NM_001400                                                                                 | 5'UTR                                                       | 0.00010635 | 0.04814618 |
| cg20149840 | HDAC4                                                       | NM_006037                                                                                 | Body                                                        | 0.00010677 | 0.04827524 |
| cg15888741 | RPP38;RPP38;RPP38;C10orf111;<br>RPP38;C10orf111;RPP38;RPP38 | NM_006414;NM_001097590;NM_001097590;<br>NM_153244;NM_183005;NM_153244;NM_183005;NM_006414 | 1stExon;5'UTR;1stExon;1stExon;5'UTR;5'UTR;<br>1stExon;5'UTR | 0.00010699 | 0.04830948 |
| cg17500329 | TRAPPC9;TRAPPC9                                             | NM_001160372;NM_031466                                                                    | Body;Body                                                   | 0.00010735 | 0.04831215 |

|            |                                 |                                                                                |                                          |            |            |
|------------|---------------------------------|--------------------------------------------------------------------------------|------------------------------------------|------------|------------|
| cg04446992 | NA                              | NA                                                                             | NA                                       | 0.0001074  | 0.04831215 |
| cg09755102 | S100PBP;YARS;YARS;S100PBP       | NM_022753;NM_003680;NM_003680;NM_001017406                                     | 5'UTR;1stExon;5'UTR;5'UTR                | 0.00010769 | 0.04831215 |
| cg04608330 | NELL2;NELL2;NELL2;NELL2;NELL2   | NM_001145110;NM_001145107;NM_006159;<br>NM_001145108;NM_001145109              | Body;Body;Body;Body;1stExon              | 0.00010788 | 0.04831215 |
| cg23767977 | KRT71                           | NM_033448                                                                      | TSS1500                                  | 0.0001079  | 0.04831215 |
| cg08039585 | C1orf159                        | NM_017891                                                                      | Body                                     | 0.00010818 | 0.04831215 |
| cg23661013 | HNF1A                           | NM_000545                                                                      | TSS1500                                  | 0.00010828 | 0.04831215 |
| cg01965508 | PIGR                            | NM_002644                                                                      | TSS1500                                  | 0.00010836 | 0.04831215 |
| cg04887124 | NA                              | NA                                                                             | NA                                       | 0.00010839 | 0.04831215 |
| cg06451949 | NA                              | NA                                                                             | NA                                       | 0.00010841 | 0.04831215 |
| cg16020249 | AHDC1                           | NM_001029882                                                                   | TSS1500                                  | 0.00010865 | 0.04835462 |
| cg12593793 | NA                              | NA                                                                             | NA                                       | 0.00010903 | 0.04845816 |
| cg04138756 | SPRR3;SPRR3                     | NM_001097589;NM_005416                                                         | TSS1500;TSS1500                          | 0.00010952 | 0.048616   |
| cg02553489 | SQLE;SQLE                       | NM_003129;NM_003129                                                            | 1stExon;5'UTR                            | 0.00010985 | 0.04869943 |
| cg00334821 | LIMK1                           | NM_002314                                                                      | Body                                     | 0.00011024 | 0.04878772 |
| cg07723459 | NA                              | NA                                                                             | NA                                       | 0.00011053 | 0.04878772 |
| cg03209809 | CHCHD6                          | NM_032343                                                                      | TSS1500                                  | 0.0001106  | 0.04878772 |
| cg09596336 | ZEB2;ZEB2;ZEB2                  | NR_033258;NM_014795;NM_001171653                                               | Body;Body;Body                           | 0.00011063 | 0.04878772 |
| cg19484141 | SMUG1                           | NM_014311                                                                      | Body                                     | 0.00011107 | 0.04892208 |
| cg11911399 | SLC25A24;SLC25A24               | NM_013386;NM_013386                                                            | 1stExon;5'UTR                            | 0.00011135 | 0.04898    |
| cg12664633 | ZBTB22;ZBTB22;ZBTB22            | NM_001145338;NM_005453;NM_001145338                                            | 5'UTR;TSS200;1stExon                     | 0.00011171 | 0.04907764 |
| cg18160291 | HHAT;HHAT;HHAT;HHAT;HHAT;HHAT   | NM_001170580;NM_001170564;NM_001170587;<br>NM_001170588;NM_001122834;NM_018194 | TSS1500;5'UTR;TSS200;TSS200;5'UTR;TSS200 | 0.00011197 | 0.04912855 |
| cg25020232 | NA                              | NA                                                                             | NA                                       | 0.00011221 | 0.04913789 |
| cg04621069 | ECE1;ECE1;ECE1;ECE1             | NM_001113347;NM_001397;NM_001113348;NM_001113349                               | 3'UTR;3'UTR;3'UTR;3'UTR                  | 0.00011228 | 0.04913789 |
| cg24968629 | CELSR1                          | NM_014246                                                                      | Body                                     | 0.00011262 | 0.04922124 |
| cg16476048 | C10orf122                       | NM_001128202                                                                   | TSS1500                                  | 0.00011364 | 0.04948847 |
| cg08266945 | C2orf77;C2orf77;PHOSPHO2;KLHL23 | NM_001085447;NM_001085447;NM_001008489;NM_144711                               | 5'UTR;1stExon;TSS200;TSS200              | 0.00011386 | 0.04948847 |

|            |                             |                                                  |                          |            |            |
|------------|-----------------------------|--------------------------------------------------|--------------------------|------------|------------|
| cg20655342 | NA                          | NA                                               | NA                       | 0.00011393 | 0.04948847 |
| cg22716292 | NA                          | NA                                               | NA                       | 0.00011411 | 0.04948847 |
| cg09896298 | DUPD1                       | NM_001003892                                     | TSS200                   | 0.00011431 | 0.04948847 |
| cg23976179 | NA                          | NA                                               | NA                       | 0.00011442 | 0.04948847 |
| cg24288751 | NA                          | NA                                               | NA                       | 0.00011445 | 0.04948847 |
| cg13749939 | SLC25A22                    | NM_024698                                        | TSS1500                  | 0.0001145  | 0.04948847 |
| cg13611636 | ZMAT4;ZMAT4                 | NM_001135731;NM_024645                           | 5'UTR;5'UTR              | 0.00011454 | 0.04948847 |
| cg19203575 | ZNF323;ZKSCAN3;ZNF323       | NM_001135215;NM_024493;NM_145909                 | 5'UTR;5'UTR;TSS200       | 0.00011484 | 0.04955538 |
| cg09198085 | AK7                         | NM_152327                                        | Body                     | 0.00011531 | 0.04966023 |
| cg18006626 | NA                          | NA                                               | NA                       | 0.00011551 | 0.04966023 |
| cg04786791 | RRP15                       | NM_016052                                        | TSS200                   | 0.00011566 | 0.04966023 |
| cg22583147 | C3orf77                     | NM_001145030                                     | Body                     | 0.00011587 | 0.04966023 |
| cg08104402 | IFT140;CRAMP1L              | NM_014714;NM_020825                              | TSS1500;TSS1500          | 0.00011624 | 0.04966023 |
| cg01141459 | HORMAD2;HORMAD2             | NM_152510;NM_152510                              | 1stExon;5'UTR            | 0.00011626 | 0.04966023 |
| cg21766592 | SLC1A5;SLC1A5;SLC1A5;SLC1A5 | NM_001145145;NM_001145145;NM_005628;NM_001145144 | 1stExon;5'UTR;Body;5'UTR | 0.00011628 | 0.04966023 |
| cg23592392 | NA                          | NA                                               | NA                       | 0.00011638 | 0.04966023 |
| cg16705446 | APBA3                       | NM_004886                                        | Body                     | 0.00011639 | 0.04966023 |
| cg01372058 | SF3B2                       | NM_006842                                        | TSS1500                  | 0.00011657 | 0.04966816 |
| cg04358264 | CYP3A4                      | NM_017460                                        | 3'UTR                    | 0.0001167  | 0.04966816 |
| cg07797833 | NA                          | NA                                               | NA                       | 0.00011753 | 0.04995858 |



**Table S2: Selection of 478 CpGs after comparing individuals with HOMA $\leq$ 3 and  $>$ 3 (Student's t-test + Bonferroni correction).**

| CpG        | Student's t-test | UCSC_RefGene_Accession | UCSC_RefGene_Group               | UCSC_CpG_Islands_Name |
|------------|------------------|------------------------|----------------------------------|-----------------------|
| cg23475244 | 2.27366E-12      | NA                     | NA                               | NA                    |
| cg06115835 | 1.05058E-11      | SH3RF3                 | NM_001099289                     | Body                  |
| cg16278828 | 2.75829E-11      | MAN2C1                 | NM_006715                        | Body                  |
| cg16639311 | 2.96689E-11      | NA                     | NA                               | NA                    |
| cg00882175 | 6.86666E-11      | NA                     | NA                               | NA                    |
| cg20009378 | 1.31144E-10      | GRK1                   | NM_002929                        | Body                  |
| cg03438024 | 1.50385E-10      | NA                     | NA                               | NA                    |
| cg11565042 | 1.57477E-10      | GPR45                  | NM_007227                        | 1stExon               |
| cg07638362 | 1.67285E-10      | NA                     | NA                               | NA                    |
| cg08913530 | 2.63749E-10      | C10orf129              | NM_207321                        | Body                  |
| cg13875763 | 3.558E-10        | NA                     | NA                               | NA                    |
| cg02951880 | 4.2286E-10       | VANGL2                 | NM_020335                        | Body                  |
| cg19450145 | 4.28193E-10      | TULP4;TULP4            | NM_020245;NM_001007466           | Body;Body             |
| cg06199907 | 4.28514E-10      | MARVELD3               | NM_001017967                     | Body                  |
| cg00472528 | 5.89409E-10      | NA                     | NA                               | NA                    |
| cg10857489 | 5.98209E-10      | SLC12A7                | NM_006598                        | Body                  |
| cg23162967 | 6.9311E-10       | CBLB                   | NM_170662                        | TSS200                |
| cg06609415 | 6.95911E-10      | NA                     | NA                               | NA                    |
| cg15537788 | 1.02976E-09      | SIPA1L3                | NM_015073                        | 3'UTR                 |
| cg16276063 | 1.26828E-09      | SOX2OT                 | NR_004053                        | Body                  |
| cg04724873 | 1.50316E-09      | KIAA1751               | NM_001080484                     | Body                  |
| cg21963643 | 2.07292E-09      | CACNA1E                | NM_000721                        | TSS1500               |
| cg24002010 | 2.4842E-09       | TMEM86B;SAPS1          | NM_173804;NM_014931              | TSS1500;3'UTR         |
| cg09991951 | 2.64527E-09      | NA                     | NA                               | NA                    |
| cg09984469 | 2.8116E-09       | CYP26B1                | NM_019885                        | Body                  |
| cg12456777 | 2.81964E-09      | SNORD42B;RPL23A        | NR_000013;NM_000984              | TSS1500;1stExon       |
| cg18062721 | 3.19762E-09      | VGLL4;VGLL4            | NM_014667;NM_001128219           | Body;Body             |
| cg09242721 | 3.24334E-09      | TRNT1                  | NM_182916                        | TSS200                |
| cg20376082 | 3.93989E-09      | NA                     | NA                               | NA                    |
| cg08531746 | 4.18788E-09      | ATP11A;ATP11A          | NM_015205;NM_032189              | Body;Body             |
| cg15944459 | 4.21775E-09      | PLA2G6;BAIAP2L2;PLA2G6 | NM_001004426;NM_025045;NM_003560 | 3'UTR;TSS1500;3'UTR   |

|            |             |                         |                                         |                     |
|------------|-------------|-------------------------|-----------------------------------------|---------------------|
| cg19020758 | 4.22943E-09 | NA                      | NA                                      | NA                  |
| cg19967421 | 5.0164E-09  | XCR1;XCR1               | NM_005283;NM_001024644                  | Body;Body           |
| cg15999833 | 5.06114E-09 | HECW1                   | NM_015052                               | Body                |
| cg05571558 | 5.21268E-09 | ATP2B2;MIR885;ATP2B2    | NM_001683;NR_030614;NM_001001331        | Body;TSS200;Body    |
| cg12739914 | 5.7632E-09  | NA                      | NA                                      | NA                  |
| cg14964327 | 5.95968E-09 | NA                      | NA                                      | NA                  |
| cg03227783 | 8.18612E-09 | HLA-DPB2                | NR_001435                               | Body                |
| cg00638021 | 8.90586E-09 | COL1A1                  | NM_000088                               | Body                |
| cg02541778 | 9.74904E-09 | NA                      | NA                                      | NA                  |
| cg18391611 | 1.02129E-08 | SBK2                    | NM_001101401                            | Body                |
| cg00017601 | 1.03419E-08 | PTK2B;PTK2B;PTK2B;PTK2B | NM_173176;NM_173175;NM_173174;NM_004103 | Body;Body;Body;Body |
| cg06778713 | 1.04337E-08 | NA                      | NA                                      | NA                  |
| cg13436417 | 1.1216E-08  | PPAPDC1A                | NM_001030059                            | Body                |
| cg04772948 | 1.12933E-08 | LOC284788;LOC284788     | NR_027090;NR_027089                     | TSS200;TSS200       |
| cg23402821 | 1.13151E-08 | NA                      | NA                                      | NA                  |
| cg15236063 | 1.15044E-08 | SELK                    | NM_021237                               | 3'UTR               |
| cg10126022 | 1.20008E-08 | NA                      | NA                                      | NA                  |
| cg15966151 | 1.26135E-08 | NROB2                   | NM_021969                               | Body                |
| cg21654058 | 1.27815E-08 | CCDC137                 | NM_199287                               | 3'UTR               |
| cg01223673 | 1.31634E-08 | INSC                    | NM_001031853                            | TSS200              |
| cg20655342 | 1.50387E-08 | NA                      | NA                                      | NA                  |
| cg19255333 | 1.50577E-08 | PEMT;PEMT;PEMT          | NM_148172;NM_148173;NM_007169           | Body;Body;Body      |
| cg11580090 | 1.53505E-08 | CYB5R1                  | NM_016243                               | 3'UTR               |
| cg17740822 | 1.67943E-08 | DUSP6;DUSP6             | NM_001946;NM_022652                     | Body;Body           |
| cg04266929 | 1.71097E-08 | NA                      | NA                                      | NA                  |
| cg04362790 | 1.72259E-08 | NA                      | NA                                      | NA                  |
| cg08540945 | 1.77753E-08 | NA                      | NA                                      | NA                  |
| cg02194046 | 1.78768E-08 | NA                      | NA                                      | NA                  |
| cg21532334 | 1.93139E-08 | NA                      | NA                                      | NA                  |
| cg01983759 | 1.94675E-08 | MED16                   | NM_005481                               | 3'UTR               |
| cg12404679 | 1.96695E-08 | KLHL30                  | NM_198582                               | Body                |
| cg15401862 | 1.99484E-08 | KCNMB4                  | NM_014505                               | 3'UTR               |
| cg17745433 | 2.06416E-08 | OBSCN;OBSCN             | NM_052843;NM_001098623                  | Body;Body           |

|            |             |                                                                                                                                        |                                                                                                                                                                                 |                                                                                              |
|------------|-------------|----------------------------------------------------------------------------------------------------------------------------------------|---------------------------------------------------------------------------------------------------------------------------------------------------------------------------------|----------------------------------------------------------------------------------------------|
| cg24288751 | 2.07316E-08 | NA                                                                                                                                     | NA                                                                                                                                                                              | NA                                                                                           |
| cg19094530 | 2.10288E-08 | NA                                                                                                                                     | NA                                                                                                                                                                              | NA                                                                                           |
| cg12183549 | 2.22013E-08 | LOC221710;HERV-FRD                                                                                                                     | NM_001135575;NM_207582                                                                                                                                                          | Body;TSS200                                                                                  |
| cg22870994 | 2.25906E-08 | NA                                                                                                                                     | NA                                                                                                                                                                              | NA                                                                                           |
| cg10400362 | 2.40204E-08 | AJAP1;AJAP1<br>CACNA1G;CACNA1G;CACNA1G;CACNA1G;CACNA1G;CACNA1G;CACNA1G;CACNA1G;CACNA1G;CACNA1G;CACNA1G;CACNA1G;CACNA1G;CACNA1G;CACNA1G | NM_018836;NM_001042478<br>NM_198384;NM_198379;NM_198380;NM_198377;NM_198385;NM_018896;NM_198396;NM_198386;NM_198376;NM_198397;NM_198388;NM_198383;NM_198382;NM_198378;NM_198387 | Body;Body<br>Body;Body;Body;Body;Body;Body;Body;Body;Body;Body;Body;Body;Body;Body;Body;Body |
| cg03649497 | 2.447E-08   | 1G;CACNA1G;CACNA1G                                                                                                                     |                                                                                                                                                                                 | Body;Body;Body                                                                               |
| cg01764559 | 2.62922E-08 | NA                                                                                                                                     | NA                                                                                                                                                                              | NA                                                                                           |
| cg04217096 | 2.67583E-08 | KANK4                                                                                                                                  | NM_181712                                                                                                                                                                       | TSS1500                                                                                      |
| cg17367356 | 2.73791E-08 | MAPK8IP1                                                                                                                               | NM_005456                                                                                                                                                                       | TSS200                                                                                       |
| cg02765496 | 2.89732E-08 | FAM122A;PIP5K1B                                                                                                                        | NM_138333;NM_003558                                                                                                                                                             | TSS1500;5'UTR                                                                                |
| cg02866076 | 3.02165E-08 | NA                                                                                                                                     | NA                                                                                                                                                                              | NA                                                                                           |
| cg16925003 | 3.05511E-08 | PXDN                                                                                                                                   | NM_012293                                                                                                                                                                       | Body                                                                                         |
| cg19294931 | 3.1771E-08  | TTBK1                                                                                                                                  | NM_032538                                                                                                                                                                       | Body                                                                                         |
| cg09853839 | 3.17816E-08 | NA                                                                                                                                     | NA                                                                                                                                                                              | NA                                                                                           |
| cg18934822 | 3.2196E-08  | SKI                                                                                                                                    | NM_003036                                                                                                                                                                       | Body                                                                                         |
| cg13441112 | 3.41983E-08 | NA                                                                                                                                     | NA                                                                                                                                                                              | NA                                                                                           |
| cg03820205 | 3.44103E-08 | VDAC2                                                                                                                                  | NM_003375                                                                                                                                                                       | TSS200                                                                                       |
| cg14464244 | 3.7604E-08  | MAGI2                                                                                                                                  | NM_012301                                                                                                                                                                       | TSS200                                                                                       |
| cg09540629 | 3.84003E-08 | KNDC1                                                                                                                                  | NM_152643                                                                                                                                                                       | Body                                                                                         |
| cg10293354 | 3.84713E-08 | NA                                                                                                                                     | NA                                                                                                                                                                              | NA                                                                                           |
| cg11791144 | 3.85635E-08 | NRG1                                                                                                                                   | NM_013962                                                                                                                                                                       | Body                                                                                         |
| cg01965508 | 3.88554E-08 | PIGR                                                                                                                                   | NM_002644                                                                                                                                                                       | TSS1500                                                                                      |
| cg22341273 | 3.91313E-08 | HEATR7A;HEATR7A;HEATR7A                                                                                                                | NM_001099281;NM_001099280;NM_032450                                                                                                                                             | Body;Body;Body                                                                               |
| cg18911817 | 3.95763E-08 | NKD2                                                                                                                                   | NM_033120                                                                                                                                                                       | Body                                                                                         |
| cg08145495 | 3.97216E-08 | FUT6;FUT6                                                                                                                              | NM_001040701;NM_000150                                                                                                                                                          | 5'UTR;5'UTR                                                                                  |
| cg20566449 | 4.35244E-08 | RASA3                                                                                                                                  | NM_007368                                                                                                                                                                       | Body                                                                                         |
| cg21864616 | 4.48546E-08 | NA                                                                                                                                     | NA                                                                                                                                                                              | NA                                                                                           |
| cg02793828 | 4.50708E-08 | NA                                                                                                                                     | NA                                                                                                                                                                              | NA                                                                                           |
| cg09869950 | 4.52145E-08 | FGGY;FGGY                                                                                                                              | NM_018291;NM_001113411                                                                                                                                                          | 5'UTR;5'UTR                                                                                  |
| cg00931944 | 4.53348E-08 | NA                                                                                                                                     | NA                                                                                                                                                                              | NA                                                                                           |
| cg13397282 | 4.57856E-08 | DAB2IP;DAB2IP                                                                                                                          | NM_138709;NM_032552                                                                                                                                                             | Body;Body                                                                                    |
| cg04792380 | 4.87879E-08 | NA                                                                                                                                     | NA                                                                                                                                                                              | NA                                                                                           |

|            |             |                     |                                     |                |
|------------|-------------|---------------------|-------------------------------------|----------------|
| cg23924911 | 4.97327E-08 | NA                  | NA                                  | NA             |
| cg10379653 | 5.18306E-08 | TBC1D1;PTTG2        | NM_015173;NM_006607                 | Body;1stExon   |
| cg03771840 | 5.35627E-08 | TRIM15              | NM_033229                           | 3'UTR          |
| cg18511558 | 5.40603E-08 | ARHGEF10            | NM_014629                           | Body           |
| cg00570269 | 5.43131E-08 | C13orf33            | NM_032849                           | Body           |
| cg06836020 | 5.44411E-08 | LOC440354;LOC595101 | NR_002473;NR_002453                 | Body;Body      |
| cg10727660 | 5.56421E-08 | AGAP3               | NM_031946                           | Body           |
| cg18100830 | 5.64357E-08 | NA                  | NA                                  | NA             |
| cg06134974 | 5.82743E-08 | CSRNP2              | NM_030809                           | TSS1500        |
| cg24613691 | 6.24462E-08 | NA                  | NA                                  | NA             |
| cg04661591 | 6.52969E-08 | NA                  | NA                                  | NA             |
| cg21683619 | 6.56135E-08 | LEPR;LEPR;LEPR      | NM_001003679;NM_002303;NM_001003680 | Body;Body;Body |
| cg00830435 | 6.6445E-08  | NA                  | NA                                  | NA             |
| cg08723637 | 6.75922E-08 | NA                  | NA                                  | NA             |
| cg24545908 | 6.77123E-08 | NA                  | NA                                  | NA             |
| cg18701983 | 6.82271E-08 | TNXB                | NM_019105                           | 5'UTR          |
| cg02263813 | 6.94561E-08 | MT1A;MT1A           | NM_005946;NM_005946                 | 1stExon;5'UTR  |
| cg01789926 | 7.08109E-08 | C16orf91            | NM_001010878                        | Body           |
| cg13116086 | 7.11835E-08 | POM121L10P          | NR_024593                           | TSS1500        |
| cg10790887 | 7.25235E-08 | INPP5A              | NM_005539                           | Body           |
| cg20418501 | 7.25336E-08 | NA                  | NA                                  | NA             |
| cg03312366 | 7.27935E-08 | NA                  | NA                                  | NA             |
| cg22964775 | 7.63059E-08 | LPHN3               | NM_015236                           | TSS1500        |
| cg07433154 | 7.6651E-08  | NA                  | NA                                  | NA             |
| cg20752695 | 7.94813E-08 | NA                  | NA                                  | NA             |
| cg11181726 | 7.96382E-08 | NA                  | NA                                  | NA             |
| cg21319458 | 8.15635E-08 | BAZ2B;BAZ2B         | NM_013450;NM_013450                 | 1stExon;5'UTR  |
| cg11024682 | 8.88179E-08 | SREBF1;SREBF1       | NM_004176;NM_001005291              | Body;Body      |
| cg14044465 | 9.32479E-08 | NA                  | NA                                  | NA             |
| cg14563732 | 9.41621E-08 | TSNARE1             | NM_145003                           | 5'UTR          |
| cg17460597 | 1.06124E-07 | NA                  | NA                                  | NA             |
| cg08438435 | 1.06434E-07 | APBA2;APBA2         | NM_001130414;NM_005503              | Body;Body      |
| cg06954660 | 1.09748E-07 | HLA-DOA             | NM_002119                           | Body           |

|            |             |                                  |                                                         |                             |
|------------|-------------|----------------------------------|---------------------------------------------------------|-----------------------------|
| cg19526076 | 1.1855E-07  | NA                               | NA                                                      | NA                          |
| cg10505024 | 1.19543E-07 | KEAP1;KEAP1                      | NM_203500;NM_012289                                     | Body;Body                   |
| cg18547667 | 1.22085E-07 | NA                               | NA                                                      | NA                          |
| cg13108601 | 1.22662E-07 | FRS3;PRICKLE4                    | NM_006653;NM_013397                                     | TSS1500;TSS1500             |
| cg00031105 | 1.26602E-07 | RXRB                             | NM_021976                                               | Body                        |
| cg22957121 | 1.41049E-07 | MGAT4C                           | NM_013244                                               | 5'UTR                       |
| cg05086567 | 1.4211E-07  | MPDU1;MPDU1                      | NM_004870;NR_024603                                     | TSS1500;TSS1500             |
| cg07016356 | 1.45162E-07 | CXCR1                            | NM_000634                                               | TSS1500                     |
| cg00090197 | 1.60117E-07 | TMEM125                          | NM_144626                                               | Body                        |
| cg22901726 | 1.68293E-07 | NA                               | NA                                                      | NA                          |
| cg16462528 | 1.76319E-07 | LECT1;LECT1                      | NM_001011705;NM_007015                                  | Body;Body                   |
| cg01243823 | 1.84771E-07 | NOD2                             | NM_022162                                               | Body                        |
| cg00584840 | 1.86037E-07 | NA                               | NA                                                      | NA                          |
| cg21473183 | 1.89452E-07 | GNLY;GNLY                        | NM_006433;NM_012483                                     | 3'UTR;3'UTR                 |
| cg00310201 | 1.92627E-07 | ZAP70;ZAP70                      | NM_001079;NM_207519                                     | Body;Body                   |
| cg25020232 | 1.98102E-07 | NA                               | NA                                                      | NA                          |
| cg00366594 | 1.99596E-07 | MIR527                           | NR_030219                                               | TSS1500                     |
| cg11911399 | 2.07671E-07 | SLC25A24;SLC25A24                | NM_013386;NM_013386                                     | 1stExon;5'UTR               |
| cg01973725 | 2.20784E-07 | RNU5E;RNU5D;ZCCHC9;ZCCHC9;ZCCHC9 | NR_002754;NR_002755;NM_032280;NM_001131036;NM_001131035 | Body;Body;3'UTR;3'UTR;3'UTR |
| cg20011604 | 2.37712E-07 | TUBA3C                           | NM_006001                                               | Body                        |
| cg20891622 | 2.39133E-07 | WDR82;MIRLET7G                   | NM_025222;NR_029660                                     | Body;TSS1500                |
| cg04026699 | 2.53236E-07 | NA                               | NA                                                      | NA                          |
| cg18784586 | 2.58614E-07 | GPRC5A;GPRC5A                    | NM_003979;NM_003979                                     | 1stExon;5'UTR               |
| cg02883247 | 2.59447E-07 | KIRREL3;KIRREL3                  | NM_001161707;NM_032531                                  | Body;Body                   |
| cg04889221 | 2.6298E-07  | CCDC37                           | NM_182628                                               | Body                        |
| cg06423822 | 2.66213E-07 | PTPRN2;PTPRN2;PTPRN2             | NM_002847;NM_130842;NM_130843                           | Body;Body;Body              |
| cg05978306 | 2.70876E-07 | MYO1C;MYO1C;MYO1C                | NM_001080779;NM_033375;NM_001080950                     | Body;Body;Body              |
| cg19741148 | 2.82975E-07 | NA                               | NA                                                      | NA                          |
| cg03708092 | 2.89339E-07 | NA                               | NA                                                      | NA                          |
| cg04903691 | 2.95125E-07 | CXCR5;CXCR5                      | NM_001716;NM_032966                                     | Body;TSS200                 |
| cg05397362 | 2.97918E-07 | NA                               | NA                                                      | NA                          |
| cg02194842 | 3.2617E-07  | NA                               | NA                                                      | NA                          |

|            |             |                                  |                                                                            |                                           |
|------------|-------------|----------------------------------|----------------------------------------------------------------------------|-------------------------------------------|
| cg08370718 | 3.35668E-07 | DTWD1;DTWD1;DTWD1;DTWD1;C15orf33 | NM_020234;NM_001144955;NM_001144955;NM_020234;NM_152647                    | 1stExon;1stExon;5'UTR;5'UTR;TSS200        |
| cg24677472 | 3.37084E-07 | NA                               | NA                                                                         | NA                                        |
| cg13086025 | 3.47324E-07 | KIAA1967;KIAA1967                | NM_021174;NM_199205                                                        | Body;Body                                 |
| cg20168964 | 3.53425E-07 | TMEM132D                         | NM_133448                                                                  | Body                                      |
| cg05104581 | 3.67876E-07 | ACSF3;ACSF3;ACSF3                | NR_023316;NM_001127214;NM_174917                                           | Body;5'UTR;5'UTR                          |
| cg22636056 | 3.6978E-07  | NA                               | NA                                                                         | NA                                        |
| cg09422450 | 3.73293E-07 | NA                               | NA                                                                         | NA                                        |
| cg09764443 | 3.75675E-07 | POU2F3                           | NM_014352                                                                  | TSS1500                                   |
| cg06580551 | 3.99214E-07 | ZNF662;ZNF662;ZNF662             | NM_001134656;NM_207404;NM_207404                                           | TSS200;5'UTR;1stExon                      |
| cg21466107 | 4.01298E-07 | GLI3                             | NM_000168                                                                  | Body                                      |
| cg17588812 | 4.15505E-07 | KIF1A                            | NM_004321                                                                  | Body                                      |
| cg06180061 | 4.20369E-07 | C16orf91                         | NM_001010878                                                               | Body                                      |
| cg04737885 | 4.2149E-07  | ADCY9                            | NM_001116                                                                  | 3'UTR                                     |
| cg04559178 | 4.27593E-07 | NA                               | NA                                                                         | NA                                        |
| cg17484877 | 4.42465E-07 | PTPRN2;PTPRN2;PTPRN2             | NM_002847;NM_130842;NM_130843                                              | Body;Body;Body                            |
| cg06330593 | 4.43392E-07 | KRT34                            | NM_021013                                                                  | Body                                      |
| cg02393907 | 4.88982E-07 | ACTR3C                           | NM_001164458                                                               | 5'UTR                                     |
| cg08204369 | 5.44356E-07 | HN1;HN1;HN1;HN1;HN1;HN1          | NM_001002033;NM_001002032;NM_001002032;NM_016185;NM_001002033;NM_016185    | 5'UTR;5'UTR;1stExon;5'UTR;1stExon;1stExon |
| cg09174741 | 5.47928E-07 | THSD1;THSD1                      | NM_199263;NM_018676                                                        | TSS1500;TSS1500                           |
| cg18160291 | 5.75061E-07 | HHAT;HHAT;HHAT;HHAT;HHAT;HHAT    | NM_001170580;NM_001170564;NM_001170587;NM_001170588;NM_001122834;NM_018194 | TSS1500;5'UTR;TSS200;TSS200;5'UTR;TSS200  |
| cg07395907 | 5.8612E-07  | NA                               | NA                                                                         | NA                                        |
| cg10525720 | 6.41707E-07 | NA                               | NA                                                                         | NA                                        |
| cg16814416 | 6.43182E-07 | TCTEX1D4                         | NM_001013632                                                               | Body                                      |
| cg02048674 | 6.44307E-07 | RPL13AP5;RPL13A                  | NR_026712;NM_012423                                                        | Body;Body                                 |
| cg00658449 | 6.48062E-07 | BEYLA;BEYLA                      | NR_027012;NR_027013                                                        | TSS1500;TSS1500                           |
| cg13885205 | 6.52385E-07 | NA                               | NA                                                                         | NA                                        |
| cg20936321 | 6.59944E-07 | NA                               | NA                                                                         | NA                                        |
| cg09872774 | 6.66606E-07 | NR2E3;NR2E3                      | NM_014249;NM_016346                                                        | Body;Body                                 |
| cg12853981 | 6.69682E-07 | TOMM20L                          | NM_207377                                                                  | 1stExon                                   |
| cg13238876 | 6.77107E-07 | NA                               | NA                                                                         | NA                                        |
| cg19385725 | 7.04686E-07 | NPC1                             | NM_000271                                                                  | Body                                      |
| cg05063097 | 7.0554E-07  | ZNF423                           | NM_015069                                                                  | TSS1500                                   |

|            |             |                                 |                                                  |                             |
|------------|-------------|---------------------------------|--------------------------------------------------|-----------------------------|
| cg20186995 | 7.64286E-07 | NA                              | NA                                               | NA                          |
| cg03531754 | 7.67304E-07 | FAM83A;FAM83A                   | NM_032899;NM_207006                              | TSS1500;TSS1500             |
| cg00097968 | 7.81125E-07 | RPTN                            | NM_001122965                                     | 3'UTR                       |
| cg08052428 | 7.84066E-07 | RALGDS;RALGDS                   | NM_001042368;NM_006266                           | Body;1stExon                |
| cg03705947 | 7.96725E-07 | GADD45A                         | NM_001924                                        | Body                        |
| cg17362483 | 8.0517E-07  | NA                              | NA                                               | NA                          |
| cg03871124 | 8.29958E-07 | NA                              | NA                                               | NA                          |
| cg05567435 | 8.34919E-07 | METTL7B                         | NM_152637                                        | TSS1500                     |
| cg14750501 | 8.53962E-07 | CCNE1;CCNE1;CCNE1               | NM_057182;NM_001238;NM_001238                    | TSS1500;5'UTR;1stExon       |
| cg04618340 | 8.59408E-07 | NA                              | NA                                               | NA                          |
| cg13241473 | 8.61287E-07 | TFEB;TFEB                       | NM_001167827;NM_007162                           | 5'UTR;TSS1500               |
| cg20038204 | 8.63952E-07 | SETBP1                          | NM_015559                                        | Body                        |
| cg02694576 | 8.64878E-07 | PTDSS2                          | NM_030783                                        | Body                        |
| cg04138756 | 8.79843E-07 | SPRR3;SPRR3                     | NM_001097589;NM_005416                           | TSS1500;TSS1500             |
| cg15305352 | 8.92336E-07 | NA                              | NA                                               | NA                          |
| cg02021157 | 8.92661E-07 | KCNQ1;KCNQ1                     | NM_000218;NM_181798                              | Body;Body                   |
| cg02304481 | 9.09056E-07 | FAM178B;FAM178B                 | NM_001122646;NM_001122646                        | 5'UTR;1stExon               |
| cg25214900 | 9.16871E-07 | SYT1;SYT1;SYT1                  | NM_005639;NM_001135805;NM_001135806              | Body;Body;Body              |
| cg09887867 | 9.23434E-07 | NA                              | NA                                               | NA                          |
| cg12438413 | 9.32189E-07 | RARA;RARA;RARA;RARA             | NM_001145301;NM_000964;NM_001024809;NM_001145302 | Body;Body;Body;Body         |
| cg05422174 | 9.42446E-07 | KIRREL3;KIRREL3                 | NM_001161707;NM_032531                           | Body;Body                   |
| cg06611444 | 9.57503E-07 | NA                              | NA                                               | NA                          |
| cg23104823 | 1.0005E-06  | PRPF39;PRPF39                   | NM_017922;NM_017922                              | 1stExon;5'UTR               |
| cg06883956 | 1.00222E-06 | MEGF6;MIR551A                   | NM_001409;NR_030277                              | Body;Body                   |
| cg08266945 | 1.03039E-06 | C2orf77;C2orf77;PHOSPHO2;KLHL23 | NM_001085447;NM_001085447;NM_001008489;NM_144711 | 5'UTR;1stExon;TSS200;TSS200 |
| cg04948475 | 1.04455E-06 | UGT2A3;UGT2A3                   | NM_024743;NR_024010                              | Body;Body                   |
| cg22753607 | 1.0612E-06  | ZCCHC7                          | NM_032226                                        | TSS200                      |
| cg17633683 | 1.0688E-06  | SLC6A18                         | NM_182632                                        | TSS200                      |
| cg17599958 | 1.07525E-06 | AP2A2                           | NM_012305                                        | Body                        |
| cg08980198 | 1.08186E-06 | NA                              | NA                                               | NA                          |
| cg13426340 | 1.10395E-06 | NA                              | NA                                               | NA                          |
| cg09015484 | 1.1224E-06  | NA                              | NA                                               | NA                          |
| cg23205818 | 1.15944E-06 | RGS6                            | NM_004296                                        | Body                        |

|            |             |                     |                                                  |                         |
|------------|-------------|---------------------|--------------------------------------------------|-------------------------|
| cg08073153 | 1.16831E-06 | LEMD2;LEMD2         | NM_181336;NM_001143944                           | Body;TSS200             |
| cg22920258 | 1.24438E-06 | MCHR1               | NM_005297                                        | TSS1500                 |
| cg11342452 | 1.25461E-06 | NKX6-2              | NM_177400                                        | TSS1500                 |
| cg13896328 | 1.28565E-06 | PTPRU;PTPRU;PTPRU   | NM_005704;NM_133178;NM_133177                    | 3'UTR;3'UTR;3'UTR       |
| cg21120176 | 1.30498E-06 | LOC285780           | NR_026970                                        | Body                    |
| cg21367769 | 1.33453E-06 | SCGN                | NM_006998                                        | TSS1500                 |
| cg03900195 | 1.34178E-06 | CHAF1B              | NM_005441                                        | 5'UTR                   |
| cg17767933 | 1.35476E-06 | NA                  | NA                                               | NA                      |
| cg07835232 | 1.37663E-06 | DENND2A             | NM_015689                                        | TSS1500                 |
| cg22583147 | 1.45322E-06 | C3orf77             | NM_001145030                                     | Body                    |
| cg19500057 | 1.54155E-06 | STRN3;STRN3;MIR624  | NM_001083893;NM_014574;NR_030354                 | Body;Body;TSS1500       |
| cg22081084 | 1.64058E-06 | LRRC8B              | NM_001134476                                     | TSS200                  |
| cg03209809 | 1.7336E-06  | CHCHD6              | NM_032343                                        | TSS1500                 |
| cg06167524 | 1.77811E-06 | NA                  | NA                                               | NA                      |
| cg13733010 | 1.86153E-06 | ZNF716              | NM_001159279                                     | 3'UTR                   |
| cg23661013 | 1.88315E-06 | HNF1A               | NM_000545                                        | TSS1500                 |
| cg07145255 | 2.01286E-06 | DEPDC1B;DEPDC1B     | NM_018369;NM_001145208                           | Body;Body               |
| cg19418922 | 2.04665E-06 | EXT2;EXT2           | NM_000401;NM_207122                              | 3'UTR;3'UTR             |
| cg04238871 | 2.0736E-06  | FAM53B              | NM_014661                                        | 5'UTR                   |
| cg21151017 | 2.09906E-06 | NA                  | NA                                               | NA                      |
| cg24146685 | 2.28164E-06 | MOGAT3              | NM_178176                                        | TSS1500                 |
| cg23991169 | 2.30916E-06 | PCGF3               | NM_006315                                        | Body                    |
| cg00170564 | 2.31057E-06 | BTBD11              | NM_001018072                                     | Body                    |
| cg00397871 | 2.39515E-06 | CCDC129             | NM_194300                                        | 3'UTR                   |
| cg03694795 | 2.43155E-06 | SC65                | NM_006455                                        | Body                    |
| cg17780691 | 2.53023E-06 | MYH3                | NM_002470                                        | Body                    |
| cg03399598 | 2.53306E-06 | GALNT7              | NM_017423                                        | Body                    |
| cg04621069 | 2.59815E-06 | ECE1;ECE1;ECE1;ECE1 | NM_001113347;NM_001397;NM_001113348;NM_001113349 | 3'UTR;3'UTR;3'UTR;3'UTR |
| cg11057205 | 2.64106E-06 | NA                  | NA                                               | NA                      |
| cg23784907 | 2.65508E-06 | PATL1               | NM_152716                                        | TSS200                  |
| cg05935374 | 2.72558E-06 | RAB30               | NM_014488                                        | TSS200                  |
| cg14028671 | 2.72906E-06 | NPDC1               | NM_015392                                        | Body                    |
| cg23789977 | 2.75552E-06 | NA                  | NA                                               | NA                      |



|            |             |                               |                                                                         |                               |
|------------|-------------|-------------------------------|-------------------------------------------------------------------------|-------------------------------|
| cg08458400 | 2.76783E-06 | CNR1;CNR1;CNR1;CNR1;CNR1;CNR1 | NM_001160259;NM_001160226;NM_001160258;NM_001160260;NM_033181;NM_016083 | Body;Body;Body;Body;Body;Body |
| cg01841050 | 2.9369E-06  | KRT34                         | NM_021013                                                               | TSS1500                       |
| cg13554030 | 2.96963E-06 | LSM2                          | NM_021177                                                               | Body                          |
| cg21457856 | 3.01714E-06 | NA                            | NA                                                                      | NA                            |
| cg12484590 | 3.01996E-06 | NA                            | NA                                                                      | NA                            |
| cg16198129 | 3.14845E-06 | ZNF662;ZNF662                 | NM_207404;NM_001134656                                                  | Body;Body                     |
| cg15877295 | 3.20094E-06 | UBN2                          | NM_173569                                                               | TSS1500                       |
| cg00832650 | 3.30614E-06 | FLNC;FLNC                     | NM_001127487;NM_001458                                                  | Body;Body                     |
| cg20451986 | 3.44104E-06 | NA                            | NA                                                                      | NA                            |
| cg17126142 | 3.49708E-06 | NA                            | NA                                                                      | NA                            |
| cg09198085 | 3.76421E-06 | AK7                           | NM_152327                                                               | Body                          |
| cg21950037 | 3.8386E-06  | NA                            | NA                                                                      | NA                            |
| cg14156446 | 3.99672E-06 | NR6A1;NR6A1                   | NM_033334;NM_001489                                                     | 3'UTR;3'UTR                   |
| cg02051981 | 4.00597E-06 | PAPPA2;PAPPA2                 | NM_021936;NM_020318                                                     | TSS200;TSS200                 |
| cg17361449 | 4.01746E-06 | TTPAL;TTPAL                   | NM_001039199;NM_024331                                                  | TSS200;TSS200                 |
| cg07036918 | 4.06634E-06 | SCUBE2;SCUBE2                 | NM_001170690;NM_020974                                                  | TSS200;TSS200                 |
| cg21304211 | 4.08443E-06 | C1orf183;C1orf183;C1orf183    | NM_198926;NM_019099;NM_019099                                           | Body;1stExon;5'UTR            |
| cg19932227 | 4.13353E-06 | ADPRH                         | NM_001125                                                               | TSS200                        |
| cg24059022 | 4.25327E-06 | SLC12A7                       | NM_006598                                                               | Body                          |
| cg12884982 | 4.42689E-06 | JPH1                          | NM_020647                                                               | Body                          |
| cg07797833 | 4.56158E-06 | NA                            | NA                                                                      | NA                            |
| cg19391498 | 4.62377E-06 | GALM                          | NM_138801                                                               | TSS1500                       |
| cg15603885 | 4.76007E-06 | ABRA                          | NM_139166                                                               | 1stExon                       |
| cg12616745 | 4.77849E-06 | MFSD6                         | NM_017694                                                               | TSS200                        |
| cg20703375 | 4.85353E-06 | ARPC1A                        | NM_006409                                                               | Body                          |
| cg01335566 | 5.20462E-06 | CHD5                          | NM_015557                                                               | Body                          |
| cg24420395 | 5.22221E-06 | DUSP4;DUSP4                   | NM_001394;NM_057158                                                     | Body;TSS1500                  |
| cg22129122 | 5.22745E-06 | NA                            | NA                                                                      | NA                            |
| cg13116438 | 5.27667E-06 | STK19;STK19;DOM3Z;STK19       | NM_004197;NM_032454;NM_005510;NR_026717                                 | Body;Body;TSS1500;Body        |
| cg01809437 | 5.55608E-06 | KLHL36                        | NM_024731                                                               | Body                          |
| cg13695383 | 5.64626E-06 | AGFG2                         | NM_006076                                                               | Body                          |
| cg12610079 | 5.67609E-06 | C1orf110                      | NM_178550                                                               | TSS1500                       |

|            |             |                      |                                     |                         |
|------------|-------------|----------------------|-------------------------------------|-------------------------|
| cg10508347 | 5.73951E-06 | SLC45A1              | NM_001080397                        | 1stExon                 |
| cg24511898 | 5.80904E-06 | ATG4B;ATG4B;THAP4    | NM_178326;NM_013325;NM_015963       | TSS1500;TSS1500;TSS200  |
| cg23061412 | 5.87491E-06 | MIR518A2             | NR_030213                           | Body                    |
| cg00232805 | 5.91099E-06 | ANKRD36              | NM_001164315                        | 1stExon                 |
| cg07312954 | 6.05547E-06 | DENND4B              | NM_014856                           | Body                    |
| cg09468777 | 6.18052E-06 | PDE6B;PDE6B;PDE6B    | NM_000283;NM_001145291;NM_001145292 | Body;Body;Body          |
| cg17746791 | 6.23926E-06 | PIM1                 | NM_002648                           | TSS200                  |
| cg13412395 | 6.28914E-06 | NR4A3;NR4A3;NR4A3    | NM_006981;NM_173198;NM_173199       | TSS1500;TSS1500;TSS1500 |
| cg19613905 | 6.30348E-06 | MNS1;MNS1            | NM_018365;NM_018365                 | 1stExon;5'UTR           |
| cg10901867 | 6.36201E-06 | NAT8L                | NM_178557                           | Body                    |
| cg10150615 | 6.3934E-06  | LOC391322            | NM_001144931                        | TSS200                  |
| cg11973777 | 6.54805E-06 | NA                   | NA                                  | NA                      |
| cg20087917 | 6.67372E-06 | C14orf133;AHSA1      | NM_022067;NM_012111                 | TSS200;TSS1500          |
| cg02180424 | 6.7242E-06  | MDGA2                | NM_001113498                        | Body                    |
| cg13135459 | 6.77115E-06 | LOC387646            | NR_003525                           | TSS200                  |
| cg11332951 | 6.8941E-06  | NA                   | NA                                  | NA                      |
| cg13611636 | 7.06685E-06 | ZMAT4;ZMAT4          | NM_001135731;NM_024645              | 5'UTR;5'UTR             |
| cg16476048 | 7.11874E-06 | C10orf122            | NM_001128202                        | TSS1500                 |
| cg08862564 | 7.22418E-06 | CREB1;CREB1          | NM_134442;NM_004379                 | 5'UTR;5'UTR             |
| cg09864156 | 7.3205E-06  | SUPV3L1              | NM_003171                           | TSS1500                 |
| cg25188165 | 7.61478E-06 | NA                   | NA                                  | NA                      |
| cg07982899 | 7.64326E-06 | C4orf22              | NM_152770                           | Body                    |
| cg13713052 | 7.81475E-06 | FAM162A;CCDC58       | NM_014367;NM_001017928              | TSS1500;TSS200          |
| cg09529537 | 8.10782E-06 | JMY                  | NM_152405                           | TSS200                  |
| cg09379601 | 8.10817E-06 | DNASE2;DNASE2        | NM_001375;NM_001375                 | 5'UTR;1stExon           |
| cg02021544 | 8.13159E-06 | MYLK3                | NM_182493                           | TSS1500                 |
| cg10187692 | 8.43411E-06 | VPS13B;VPS13B        | NM_017890;NM_152564                 | Body;Body               |
| cg24162465 | 8.47196E-06 | NA                   | NA                                  | NA                      |
| cg21689228 | 8.59085E-06 | MSX1                 | NM_002448                           | TSS1500                 |
| cg00402074 | 8.77524E-06 | GPR116;GPR116        | NM_001098518;NM_015234              | TSS200;5'UTR            |
| cg13507084 | 8.77606E-06 | CNTFR;CNTFR          | NM_147164;NM_001842                 | Body;Body               |
| cg05626927 | 9.23777E-06 | NA                   | NA                                  | NA                      |
| cg23851043 | 9.30095E-06 | MOBK13;MOBK13;MOBK13 | NM_199482;NM_001100819;NM_015387    | 5'UTR;Body;Body         |

|            |             |                               |                                                  |                             |
|------------|-------------|-------------------------------|--------------------------------------------------|-----------------------------|
| cg02133350 | 9.37879E-06 | PMS2;PMS2                     | NM_000535;NR_003085                              | Body;Body                   |
| cg13944397 | 9.3883E-06  | NA                            | NA                                               | NA                          |
| cg04324509 | 9.44288E-06 | PCNP                          | NM_020357                                        | Body                        |
| cg08604596 | 9.53618E-06 | CCDC101                       | NM_138414                                        | 5'UTR                       |
| cg18181431 | 9.81108E-06 | NA                            | NA                                               | NA                          |
| cg13265914 | 9.81734E-06 | REEP4                         | NM_025232                                        | TSS200                      |
| cg18420708 | 9.91403E-06 | EPHX3;EPHX3                   | NM_024794;NM_001142886                           | Body;Body                   |
| cg05744073 | 9.98333E-06 | MIR132                        | NR_029674                                        | Body                        |
| cg05254095 | 1.01477E-05 | ZDHHC7;ZDHHC7                 | NM_001145548;NM_017740                           | 3'UTR;3'UTR                 |
| cg07306531 | 1.02802E-05 | ZNF75A                        | NM_153028                                        | TSS200                      |
| cg07908574 | 1.05373E-05 | SLC45A1                       | NM_001080397                                     | Body                        |
| cg21273856 | 1.09993E-05 | NCOA7;NCOA7;NCOA7;NCOA7       | NM_181782;NM_001122842;NM_181782;NM_001122842    | 5'UTR;5'UTR;1stExon;1stExon |
| cg10082357 | 1.14906E-05 | ATP6V1F                       | NM_004231                                        | 3'UTR                       |
| cg23003225 | 1.16586E-05 | NA                            | NA                                               | NA                          |
| cg07723459 | 1.17152E-05 | NA                            | NA                                               | NA                          |
| cg09311052 | 1.19085E-05 | UBE2Q1                        | NM_017582                                        | TSS1500                     |
| cg23330006 | 1.19095E-05 | NUAK1                         | NM_014840                                        | Body                        |
| cg17461336 | 1.19316E-05 | CYP3A43;CYP3A43;CYP3A43       | NM_022820;NM_057096;NM_057095                    | Body;Body;Body              |
| cg12315590 | 1.19573E-05 | C3orf37;C3orf37               | NM_001006109;NM_020187                           | TSS1500;TSS200              |
| cg11814422 | 1.20162E-05 | SNORD58A;RPL17;SNORD58B;RPL17 | NR_002571;NM_000985;NR_002572;NM_001035006       | TSS1500;5'UTR;TSS200;5'UTR  |
| cg20217938 | 1.24163E-05 | NA                            | NA                                               | NA                          |
| cg15084903 | 1.24465E-05 | THEG;THEG                     | NM_016585;NM_199202                              | TSS200;TSS200               |
| cg23413289 | 1.24614E-05 | FAT1                          | NM_005245                                        | Body                        |
| cg07650554 | 1.25627E-05 | SEPHS2                        | NM_012248                                        | TSS200                      |
| cg18219432 | 1.29432E-05 | PTPRN2;PTPRN2;PTPRN2          | NM_002847;NM_130842;NM_130843                    | Body;Body;Body              |
| cg16692534 | 1.2954E-05  | FOXK2                         | NM_004514                                        | Body                        |
| cg21607453 | 1.3026E-05  | NCRNA00092                    | NR_024129                                        | Body                        |
| cg02956660 | 1.30293E-05 | HSPG2                         | NM_005529                                        | Body                        |
| cg22136672 | 1.31467E-05 | NA                            | NA                                               | NA                          |
| cg09016822 | 1.3212E-05  | IER3                          | NM_003897                                        | TSS200                      |
| cg03045325 | 1.33837E-05 | MACROD1;FLRT1                 | NM_014067;NM_013280                              | Body;TSS200                 |
| cg16020249 | 1.36047E-05 | AHDC1                         | NM_001029882                                     | TSS1500                     |
| cg19545348 | 1.39223E-05 | RCOR3;RCOR3;RCOR3;RCOR3       | NM_018254;NM_001136224;NM_001136225;NM_001136223 | Body;Body;Body;Body         |

|            |             |                                 |                                                   |                                  |
|------------|-------------|---------------------------------|---------------------------------------------------|----------------------------------|
| cg08015507 | 1.40975E-05 | NCKIPSD;NCKIPSD                 | NM_016453;NM_184231                               | Body;Body                        |
| cg05947499 | 1.44044E-05 | TPCN1;TPCN1                     | NM_001143819;NM_017901                            | Body;Body                        |
| cg14039479 | 1.44161E-05 | GPR26                           | NM_153442                                         | 3'UTR                            |
| cg09392827 | 1.44505E-05 | NA                              | NA                                                | NA                               |
| cg17321888 | 1.45694E-05 | NA                              | NA                                                | NA                               |
| cg00455514 | 1.46261E-05 | NA                              | NA                                                | NA                               |
| cg08571347 | 1.52188E-05 | NA                              | NA                                                | NA                               |
| cg02902865 | 1.5242E-05  | DHRS3                           | NM_004753                                         | TSS1500                          |
| cg01353569 | 1.53128E-05 | HBP1                            | NM_012257                                         | 5'UTR                            |
| cg16925090 | 1.55973E-05 | KIAA1377;ANGPTL5                | NM_020802;NM_178127                               | TSS1500;5'UTR                    |
| cg05318427 | 1.56639E-05 | KCMF1                           | NM_020122                                         | Body                             |
| cg08664652 | 1.58441E-05 | GOSR1;GOSR1;GOSR1               | NM_001007024;NM_004871;NM_001007025               | TSS200;TSS200;TSS200             |
| cg00459550 | 1.5942E-05  | NA                              | NA                                                | NA                               |
| cg18006626 | 1.61122E-05 | NA                              | NA                                                | NA                               |
| cg16300033 | 1.6231E-05  | ANKRD30A                        | NM_052997                                         | TSS1500                          |
| cg16542646 | 1.65887E-05 | NA                              | NA                                                | NA                               |
| cg14054990 | 1.66351E-05 | KRTAP19-5                       | NM_181611                                         | TSS200                           |
| cg06451949 | 1.67147E-05 | NA                              | NA                                                | NA                               |
| cg03157738 | 1.73712E-05 | KANK2                           | NM_001136191                                      | 5'UTR                            |
| cg05639679 | 1.82168E-05 | KIAA1522                        | NM_020888                                         | Body                             |
| cg09564133 | 1.83058E-05 | MXD3;MXD3;MXD3;MXD3             | NM_031300;NM_001142935;NM_031300;NM_001142935     | 1stExon;1stExon;5'UTR;5'UTR      |
| cg25256723 | 1.84336E-05 | F5                              | NM_000130                                         | TSS200                           |
| cg16104446 | 1.86036E-05 | MCM4;MCM4;PRKDC;PRKDC           | NM_182746;NM_005914;NM_001081640;NM_006904        | Body;Body;TSS1500;TSS1500        |
| cg01334186 | 1.86861E-05 | PSMB4                           | NM_002796                                         | Body                             |
| cg17204834 | 1.89725E-05 | ZNF589                          | NM_016089                                         | TSS200                           |
| cg19455335 | 1.90926E-05 | C8orf58                         | NM_001013842                                      | Body                             |
| cg15649111 | 1.94177E-05 | CPA5;CPA5;CPA5                  | NM_001127441;NM_001127442;NM_080385               | Body;Body;Body                   |
| cg11688874 | 1.94417E-05 | WAC;WAC;WAC;WAC;WAC             | NM_100486;NM_016628;NM_016628;NM_100486;NR_024557 | 1stExon;5'UTR;1stExon;5'UTR;Body |
| cg17586419 | 1.95313E-05 | TOP1P2;PIWIL3                   | NR_001283;NM_001008496                            | TSS1500;5'UTR                    |
| cg21687563 | 1.97818E-05 | TTC28                           | NM_001145418                                      | Body                             |
| cg11208039 | 2.02989E-05 | ZDHHC13;ZDHHC13;ZDHHC13;ZDHHC13 | NM_001001483;NM_019028;NM_001001483;NM_019028     | 1stExon;5'UTR;5'UTR;1stExon      |
| cg14253896 | 2.08362E-05 | NA                              | NA                                                | NA                               |
| cg18350497 | 2.10935E-05 | C11orf54                        | NM_014039                                         | 5'UTR                            |

|            |             |                                       |                                                               |                                        |
|------------|-------------|---------------------------------------|---------------------------------------------------------------|----------------------------------------|
| cg08788291 | 2.16706E-05 | RECQL5;LOC643008                      | NM_004259;NM_001162995                                        | Body;TSS1500                           |
| cg13749939 | 2.27373E-05 | SLC25A22                              | NM_024698                                                     | TSS1500                                |
| cg04517374 | 2.32798E-05 | CABLES2                               | NM_031215                                                     | Body                                   |
| cg11530914 | 2.41973E-05 | FHOD1;SLC9A5                          | NM_013241;NM_004594                                           | TSS200;TSS1500                         |
| cg06900676 | 2.4586E-05  | KIAA1841;KIAA1841                     | NM_001129993;NM_032506                                        | 5'UTR;TSS200                           |
| cg02581828 | 2.46746E-05 | NA                                    | NA                                                            | NA                                     |
| cg19240857 | 2.47576E-05 | LY6G6E;LY6G6E;LY6G6D                  | NR_003673;NR_024541;NM_021246                                 | TSS1500;TSS1500;TSS200                 |
| cg01093065 | 2.48121E-05 | PLEKHA4;PLEKHA4                       | NM_001161354;NM_020904                                        | TSS1500;TSS1500                        |
| cg21104686 | 2.55396E-05 | NA                                    | NA                                                            | NA                                     |
| cg15244101 | 2.64908E-05 | NA                                    | NA                                                            | NA                                     |
| cg12402495 | 2.79807E-05 | C1orf43;C1orf43;UBAP2L;UBAP2L;C1orf43 | NM_015449;NM_138740;NM_014847;NM_001127320;NM_001098616       | 1stExon;1stExon;TSS1500;5'UTR;1st Exon |
| cg12639422 | 2.80525E-05 | UGP2;UGP2;UGP2                        | NM_006759;NM_006759;NM_001001521                              | 1stExon;5'UTR;5'UTR                    |
| cg18624108 | 2.84891E-05 | COL11A2;COL11A2;COL11A2               | NM_080679;NM_080681;NM_080680                                 | Body;Body;Body                         |
| cg01903185 | 2.85556E-05 | FGFR3;FGFR3;FGFR3                     | NM_001163213;NM_000142;NM_022965                              | Body;Body;Body                         |
| cg05608508 | 2.90887E-05 | NTAN1                                 | NM_173474                                                     | Body                                   |
| cg03797768 | 2.91474E-05 | NA                                    | NA                                                            | NA                                     |
| cg14840863 | 2.98555E-05 | COLEC11;COLEC11                       | NM_024027;NM_199235                                           | Body;Body                              |
| cg14842398 | 3.0767E-05  | KIAA0182                              | NM_001134473                                                  | 5'UTR                                  |
| cg24969222 | 3.09249E-05 | NA                                    | NA                                                            | NA                                     |
| cg13789711 | 3.16619E-05 | PHPT1;PHPT1                           | NM_001135861;NM_014172                                        | TSS200;TSS200                          |
| cg08470053 | 3.30327E-05 | ZNF160;ZNF160;ZNF160                  | NM_033288;NM_198893;NM_001102603                              | 5'UTR;5'UTR;5'UTR                      |
| cg19597318 | 3.30698E-05 | NFASC;NFASC;NFASC;NFASC;NFASC         | NM_015090;NM_001160333;NM_001005388;NM_001005389;NM_001160332 | 5'UTR;5'UTR;5'UTR;5'UTR;5'UTR          |
| cg01078248 | 3.31679E-05 | NDUFA5                                | NM_005000                                                     | Body                                   |
| cg09391949 | 3.32352E-05 | JPH3                                  | NM_020655                                                     | 3'UTR                                  |
| cg01374398 | 3.32658E-05 | SCAP                                  | NM_012235                                                     | 5'UTR                                  |
| cg02895995 | 3.37781E-05 | PEX11G                                | NM_080662                                                     | TSS200                                 |
| cg19260567 | 3.38472E-05 | CNTNAP2                               | NM_014141                                                     | Body                                   |
| cg06788172 | 3.38837E-05 | DMXL2                                 | NM_015263                                                     | TSS200                                 |
| cg19881032 | 3.39593E-05 | SLC16A8                               | NM_013356                                                     | TSS200                                 |
| cg20248822 | 3.55477E-05 | C1orf151                              | NM_001032363                                                  | TSS1500                                |
| cg14476101 | 3.58678E-05 | PHGDH                                 | NM_006623                                                     | Body                                   |
| cg16139199 | 3.62933E-05 | ESCO1                                 | NM_052911                                                     | 5'UTR                                  |

|            |             |                                           |                                                                                   |                                                  |
|------------|-------------|-------------------------------------------|-----------------------------------------------------------------------------------|--------------------------------------------------|
| cg21515243 | 3.6516E-05  | RIOK3;RIOK3                               | NM_003831;NM_003831                                                               | 1stExon;5'UTR                                    |
| cg14457132 | 3.65832E-05 | CAGE1;CAGE1;CAGE1;CAGE1;CAGE1;CAGE1;RIOK1 | NM_001170693;NM_001170693;NM_001170692;NM_205864;NM_001170692;NM_205864;NM_031480 | 1stExon;5'UTR;5'UTR;1stExon;1stExon;5'UTR;TSS200 |
| cg19407545 | 3.68515E-05 | NA                                        | NA                                                                                | NA                                               |
| cg05072951 | 3.68693E-05 | CAPN1;CAPN1                               | NM_005186;NM_005186                                                               | 1stExon;5'UTR                                    |
| cg09981884 | 3.72045E-05 | TMEM129;TMEM129                           | NM_138385;NM_001127266                                                            | Body;Body                                        |
| cg23182539 | 3.8011E-05  | TIAL1;TIAL1                               | NM_001033925;NM_003252                                                            | Body;Body                                        |
| cg02841941 | 3.83937E-05 | P2RY1                                     | NM_002563                                                                         | TSS200                                           |
| cg20412283 | 3.87444E-05 | DDAH2                                     | NM_013974                                                                         | 5'UTR                                            |
| cg23319790 | 4.13426E-05 | MIR519D;MIR517A                           | NR_030202;NR_030201                                                               | TSS1500;TSS200                                   |
| cg00334821 | 4.13649E-05 | LIMK1                                     | NM_002314                                                                         | Body                                             |
| cg07022307 | 4.27829E-05 | ATP1A4;ATP1A4                             | NM_001001734;NM_144699                                                            | TSS1500;Body                                     |
| cg03609216 | 4.30037E-05 | TRIM15                                    | NM_033229                                                                         | 1stExon                                          |
| cg08846459 | 4.30904E-05 | NA                                        | NA                                                                                | NA                                               |
| cg02582774 | 4.36382E-05 | COQ5                                      | NM_032314                                                                         | Body                                             |
| cg04598128 | 4.47278E-05 | NA                                        | NA                                                                                | NA                                               |
| cg00986762 | 4.6156E-05  | PSMB2;PSMB2                               | NM_002794;NM_002794                                                               | 1stExon;5'UTR                                    |
| cg16209873 | 4.70209E-05 | OR52W1                                    | NM_001005178                                                                      | TSS1500                                          |
| cg13442432 | 4.71524E-05 | NA                                        | NA                                                                                | NA                                               |
| cg12937438 | 4.71771E-05 | NA                                        | NA                                                                                | NA                                               |
| cg24250234 | 4.73595E-05 | NA                                        | NA                                                                                | NA                                               |
| cg09878914 | 4.81037E-05 | BAT1;BAT1                                 | NM_080598;NM_004640                                                               | Body;Body                                        |
| cg09896298 | 4.82183E-05 | DUPD1                                     | NM_001003892                                                                      | TSS200                                           |
| cg06665941 | 4.82581E-05 | IFNAR2;IFNAR2;IFNAR2                      | NM_207585;NM_207584;NM_000874                                                     | 5'UTR;5'UTR;5'UTR                                |
| cg05353415 | 4.83533E-05 | GLI3                                      | NM_000168                                                                         | 5'UTR                                            |
| cg18543035 | 4.98898E-05 | NA                                        | NA                                                                                | NA                                               |
| cg02881186 | 5.10707E-05 | TRAPPC9;TRAPPC9                           | NM_001160372;NM_031466                                                            | Body;Body                                        |
| cg20261243 | 5.12876E-05 | NCOA5                                     | NM_020967                                                                         | TSS200                                           |
| cg06734816 | 5.12966E-05 | NT5DC1                                    | NM_152729                                                                         | Body                                             |
| cg01206944 | 5.24292E-05 | ATP10A                                    | NM_024490                                                                         | Body                                             |
| cg01258793 | 5.24975E-05 | MAD1L1;MAD1L1;MAD1L1                      | NM_003550;NM_001013837;NM_001013836                                               | Body;Body;Body                                   |
| cg11596580 | 5.25558E-05 | PRMT8;PRMT8                               | NM_019854;NM_019854                                                               | 1stExon;5'UTR                                    |
| cg18342900 | 5.28019E-05 | C16orf87                                  | NM_001001436                                                                      | 1stExon                                          |

|            |             |                                         |                                                   |                              |
|------------|-------------|-----------------------------------------|---------------------------------------------------|------------------------------|
| cg19819135 | 5.28108E-05 | SFRS11                                  | NM_004768                                         | Body                         |
| cg06963308 | 5.39577E-05 | NA                                      | NA                                                | NA                           |
| cg14007221 | 5.45473E-05 | FRMPD1                                  | NM_014907                                         | 5'UTR                        |
| cg14138312 | 5.48704E-05 | KDM4C;KDM4C;KDM4C;KDM4C                 | NM_015061;NM_001146694;NM_001146695;NM_001146696  | Body;Body;Body;Body          |
| cg20303815 | 5.50609E-05 | NA                                      | NA                                                | NA                           |
| cg16815882 | 5.54133E-05 | KIAA0319L                               | NM_024874                                         | Body                         |
| cg25233569 | 5.56696E-05 | RHOBTB1;RHOBTB1;RHOBTB1;RHOBTB1;RHOBTB1 | NR_024555;NM_014836;NM_014836;NR_024554;NR_024556 | Body;1stExon;5'UTR;Body;Body |
| cg19775406 | 5.60252E-05 | MIS12;MIS12;DERL2                       | NM_024039;NM_024039;NM_016041                     | 5'UTR;1stExon;TSS1500        |
| cg18669135 | 5.62547E-05 | NA                                      | NA                                                | NA                           |
| cg18181703 | 5.6629E-05  | SOCS3                                   | NM_003955                                         | Body                         |
| cg02668984 | 5.74385E-05 | PDK2                                    | NM_002611                                         | TSS1500                      |
| cg03160445 | 5.74437E-05 | LNP1;TOMM70A;LNP1                       | NM_001085451;NM_014820;NM_001085451               | 5'UTR;TSS200;1stExon         |
| cg01141459 | 5.7446E-05  | HORMAD2;HORMAD2                         | NM_152510;NM_152510                               | 1stExon;5'UTR                |
| cg00004939 | 5.78357E-05 | C14orf181;C14orf181                     | NM_207442;NM_207442                               | 3'UTR;1stExon                |
| cg04428700 | 5.83483E-05 | HOXA13                                  | NM_000522                                         | 1stExon                      |
| cg21939482 | 5.84953E-05 | C7orf70                                 | NM_001037163                                      | 5'UTR                        |
| cg16053745 | 5.87734E-05 | C3orf43                                 | NM_001077657                                      | Body                         |
| cg01489057 | 5.91874E-05 | DMBT1;DMBT1;DMBT1                       | NM_007329;NM_004406;NM_017579                     | Body;Body;Body               |
| cg03811519 | 5.92466E-05 | NUP214                                  | NM_005085                                         | Body                         |
| cg20980271 | 5.9684E-05  | CLCC1;CLCC1                             | NM_001048210;NM_015127                            | TSS1500;TSS1500              |
| cg11755407 | 6.09251E-05 | EML3;MTA2                               | NM_153265;NM_004739                               | Body;TSS1500                 |
| cg22312050 | 6.141E-05   | NA                                      | NA                                                | NA                           |
| cg10251347 | 6.23879E-05 | NRD1;NRD1;NRD1;NRD1                     | NM_002525;NM_002525;NM_001101662;NM_001101662     | 5'UTR;1stExon;1stExon;5'UTR  |
| cg21850852 | 6.25084E-05 | ITGB4;ITGB4;ITGB4                       | NM_001005731;NM_001005619;NM_000213               | Body;Body;Body               |
